# Supplementary material
Source: PubMed Central journal article supplement (PMC5393197)
Supplement: pnas.1616837114.sapp.pdf [file pnas.1616837114.sapp.pdf]

Online Supporting Material for

**Partner abundance controls mutualism stability and the  
pace of morphological change over geologic time**

Guillaume Chomicki and Susanne Renner

Department of Biology, Systematic Botany and Mycology, Menzinger Str. 67,  
University of Munich (LMU), Munich 80638

**Corresponding author:** [guillaume.chomicki@gmail.com](mailto:guillaume.chomicki@gmail.com) (G.C.)

**This pdf contains:**

|                                                                                                                                         |    |
|-----------------------------------------------------------------------------------------------------------------------------------------|----|
| <b>1. Supplementary Materials and Methods</b> .....                                                                                     | 3  |
| <i>Taxon sampling, DNA extraction and phylogenetic analyses</i> .....                                                                   | 3  |
| <i>Molecular clock dating</i> .....                                                                                                     | 4  |
| <i>Ancestral state reconstructions of mutualistic strategies, entrance hole diameter, elevation and biome</i> .....                     | 4  |
| <i>Multinomial logistic regressions</i> .....                                                                                           | 5  |
| <i>Phylogenetic ANOVA</i> .....                                                                                                         | 6  |
| <i>Bayesian correlation between mutualistic strategy and altitude, and mutualism strategy and entrance hole evolutionary rate</i> ..... | 6  |
| <i>Comparing niche space across mutualistic strategies</i> .....                                                                        | 7  |
| <i>Inferring rates of entrance hole-diameter evolution using BAMM</i> .....                                                             | 7  |
| <i>Hierarchical Bayesian Modeling</i> .....                                                                                             | 7  |
| <i>Inferring rates of entrance hole diameter evolution using the non-censored rate test</i> .....                                       | 8  |
| <i>Entrance hole morphological disparity-through-time plots</i> .....                                                                   | 9  |
| <i>Mapping morphological evolutionary rate in New Guinea</i> .....                                                                      | 9  |
| <i>Supplementary references</i> .....                                                                                                   | 9  |
| <b>2. Supplementary Figures S1-S15</b> .....                                                                                            | 12 |
| <b>3. Supplementary Tables S1-S2</b> .....                                                                                              | 27 |

### ***Taxon sampling, DNA extraction and phylogenetic analyses***

We generated a matrix of six markers (nuclear ITS and ETS and plastid *ndhF*, *psbA-trnH*, *trnL* intron and *trnL-trnF* spacer), sampling 76 species out of *ca.* 106 Hydnophytinae species. We sampled all 12 *Squamellaria* species recognized by Chomicki and Renner (1), 5 of the 8 species of *Anthorrhiza* recognized by Huxley and Jebb (2), 32 of the 51 *Hydnophytum* species recognized by Jebb and Huxley, 4 of the 5 described species of *Myrmephytum* (3) and 19 of the 26 *Myrmecodia* species recognized by Huxley and Jebb (4). In addition to these 72 species, we also sequenced 4 species that were previously synonymized but stand as good species in light of molecular data. The new *Hydnophytum* species have been long described by Jebb, distributed into many herbaria, but never formally published. We refer to them as *Hydnophytum* followed by the voucher name in Table S2, and provide the name (nomen nudum) in both supplementary tables S1 and S2. In terms of mutualistic strategy, our sampling was reflected as 61% of the 44 generalists, 81% of the 41 specialists, and 74% of the 23 non-mutualists. A sampling of outgroups (in the tribe Psychotriaceae) was selected based on Ref. 5. Voucher information is reported in Table S2.

Total genomic DNA was extracted from *c.* 20 mg of leaf tissues, using a commercial plant DNA extraction kit (NucleoSpin; Macherey–Nagel, Düren, Germany) according to manufacturer protocols. Polymerase chain reaction (PCR) was performed using Taq DNA polymerase (New England Biolabs, Cambridge, MA, USA) and a standard protocol (39 cycles, annealing temperature 56<sup>0</sup>C). PCR products were purified using the ExoSap clean-up kit (Fermentas, St Leon-Rot, Germany), and sequencing relied on Big Dye Terminator kits (Applied Biosystems, Foster City, CA, USA) on an ABI 3130 automated sequencer (Applied Biosystems, Perkin-Elmer). Sequences were edited in Sequencher 5.1 (Gene Codes, Ann Arbor, MI, USA). All new sequences were BLAST-searched in GenBank. Sequence alignment was performed in MAFFT v. 7 in the online server (<http://mafft.cbrc.jp/alignment/server>) (6) under standard parameters except for the ITS region, which was aligned under Q-INS-i optimization, which takes rRNA secondary structure into consideration. Minor alignment errors were corrected manually in Mesquite v. 2.75 (7). In the absence of statistically supported incongruence (i.e., maximum likelihood bootstrap (BS) support >75) between the plastid and nuclear data partitions), we concatenated all markers, yielding an alignment of 3055 bp. Maximum-likelihood (ML) inference relied on RAxML v8.0 (8) and the GTR +  $\Gamma$  substitution model, with empirical nucleotide frequencies and 25 gamma rate categories; bootstrap support was assessed from 100 replicates under the same model. We also conducted Bayesian inference in MrBayes v. 3.2 (9) under the substitution models selected by jmodeltest2 (10) for each marker, and using the program's default two runs and four chains (one cold and three heated), with the uniform default priors. We set a 10X10<sup>6</sup> MCMC chain, sampling trees every 1000<sup>th</sup> generation. Split frequencies approaching zero indicated convergence. We used the 50% consensus tree to assess posterior probabilities for nodes of interest.

### ***Molecular clock dating***

Molecular dating analyses relied on BEAST v. 2 (11) and uncorrelated lognormal relaxed clock models. We used the GTR + G substitution model with four rate categories and a Yule tree prior. For both our plant and ant trees, MCMCs were run for 20 million generations, with parameters and trees sampled every 10,000 generations. We used Tracer v. 1.6 (12) to check that the effective sample size (ESS) of all parameters was >200, indicating that runs had converged. After discarding 10% as burn-in, trees were summarized in TreeAnnotator v. 1.8 (part of the BEAST package) using the options ‘maximum clade credibility tree’, which is the tree with the highest product of the posterior probability of all its nodes, ‘mean node height,’ and a posterior probability limit of 0.98. The final tree was visualized in FigTree v. 1.4 (13). To calibrate our tree, we constrained the age of the root, i.e., the split between the Pacific clade and the so-called *Psychotria* clade IV of Barrabé et al. (5), to  $22 \pm 7$  Million years, based on the age of this node estimated by these authors, using a normal prior and a standard deviation of 4 corresponding to the 95% confidence interval of Barrabé et al. (5).

### ***Ancestral state reconstructions of mutualistic strategies, entrance hole diameter, elevation and biome***

We inferred the evolutionary history of mutualism strategy in the Hydnophytinae. All outgroups were coded ‘0’ for non-ant associated, with no tuber. We coded the 76 ingroup species as ‘1’, generalist ant-plants, for species that can be inhabited by a range of generalist ant species, ‘2’ for specialized species that are inhabited typically by one (or two) species of the dolichoderine genera *Philidris* and *Anonychomyrma* or ‘3’ for species that are not ant-inhabited but have a tuber. Each species was coded based on refs. 14-22, and field data from Camilla Huxley (fieldwork in Papua New Guinea in the 1970’s and 1980’s), Matthew Jebb (fieldwork to Papua New Guinea in the 1980’s and 1990’s), Milan Janda (Papua New Guinea 2004-2014), Eva Kaufmann (South East Asia, Borneo, Indonesia 1998-2001), the mission Santo 2006 to Vanuatu (in particular Jerome Orivel), and Guillaume Chomicki (field trips to Fiji in 2014, 2015 and 2016) provided in Table S1. See also table S1 for a short discussion of mutualistic strategies, and inhabitants, and traits.

To infer ancestral mutualistic strategies, we used the Maximum Clade Credibility (MCC) tree from BEAST (stochastic mapping) and a sample of 1,000 trees from BEAST (rjMCMC), and (i) the stochastic mapping approach implemented in the phytools package (23) and (ii) the reverse jump MCMC (rjMCMC) approach implemented in BayesTraits v. 2 (24). For the stochastic mapping, we used the function ‘make.simmap’ in the phytools package (v. 04-60) (23), which implements the stochastic character mapping approach developed by Bollback (25). We estimated ancestral states using under the ER model, and then simulated 1,000 character histories on the MCC tree. We summarized the 1,000 simulated character histories using the function ‘describe.simmap’. For the Bayesian reversible jump MCMC approach, we used a sample of 1,000 from the BEAST analysis to account for

phylogenetic uncertainty, a chain of 50 million generations, and rate coefficients and ancestral states were sampled every 1,000<sup>th</sup> generation. We ensured that the acceptance rate was between 20 and 40%, as recommended in the manual, and reconstructed the nodes of interest using the command ‘addnode’. We reconstructed all key nodes and reported the probabilities above nodes in Fig. 1. To test the hypothesis that the absence of mutualism with ants is ancestral, we used function ‘Fossil’ implemented in BayesTraits v. 2 to ‘fossilize’ the most recent common ancestor (MRCA) of Hydnophytinae to lack symbiosis with ants, and compared it to an unconstrained run and a model where generalist symbioses are enforced. We then used Bayes Factor to compare the marginal likelihoods of these non-nested models.

We estimated ancestral state for maximum and mean elevation using the continuous character ML approach implemented in phytools (23). We relied on the function ‘fastAnc’ and plotted it using the function ‘contMap’ in phytools. Maximum elevation was recorded based on again the same references (14-22), but mean elevation was calculated for each species based on the 1,100 georeferenced specimens (Supplementary dataset 1).

We reconstructed ancestral entrance hole size using the same method. For each species we recorded the maximal entrance hole diameter based on refs. 14-22, and observations from M. Jebb reported in Table S1. Additional measures from herbarium specimens from Leiden (L), Oxford (FHO) and British Museum (BM) were performed when required for verification. Raw data is reported in Table S1.

We also reconstructed ancestral biomes using the same stochastic mapping approach in phytools. Species were coded ‘0’ as belonging to the ‘tropical forest’ biome when they were native to tropical forest below 1,500 meters in altitude, ‘1’ as belonging to the montane environment above 1,500 meters, ‘2’ from species native to savannah or grassland, and ‘3’ from species growing mostly in mangroves (a few species are sometimes found in mangal habitats, but these ML approaches do not allow for multistate characters). Again, each species was coded based on refs. 14-22.

### ***Multinomial logistic regressions***

To ask whether the distinct mutualistic strategies (*i*) significantly varied in altitude and (*ii*) significantly varied in entrance hole rate morphorate, we used a probabilistic framework to provide the probability of belonging to a particular mutualistic strategy given a value of altitude or entrance hole size morphorate. We used the R package ‘MASS’ (26), and dependencies, relying on the function ‘polr’. In each case, we used a continuous variable (maximal altitude, mean altitude, BAMM-inferred entrance hole size morphorate) and mutualistic strategy as dependent variable. These analyses do not control for phylogenetic autocorrelation and are complementary to phylogenetic ANOVA and hierarchical Bayesian Modelling. For the altitude, we ran two analyses. First using all Hydnophytinae taxa and their mean altitude calculated from (*i*) over 1,100 georeferenced points (Supplementary Dataset S1) and (*ii*) maximum altitude taken from the literature (14-22) for all Hydnophytinae sampled in our tree. Our multinomial logistic regressions identified a positive exponential relationship between increasing altitude and the probability of being a non-mutualist,

as opposed to a generalist mutualist, which showed the reverse pattern (Fig. S2, S3). For the entrance hole morphorate, our multinomial logistic regression (t-value = 0.59, AIC = 165.1) identified a positive relationship between increasing morphorate and the probability of being a non-mutualist, and the inverse relationship for the probability of being a specialist (Fig. S13).

### ***Phylogenetic ANOVA***

To test whether the distinct mutualistic strategies (generalists, specialists, non-mutualists) have significantly different altitudinal ranges, while accounting for phylogenetic autocorrelation, we performed a phylogenetic ANOVA using the function ‘*phylANOVA*’ implemented in the R package ‘*phytools*’ (23). We used 1,000 simulations and performed a post-hoc test using the Bonferroni-Holm method. We used either maximal or mean (calculated using over 1,100 georeferenced points from herbarium specimens) altitude as independent variable, which yielded highly similar results.

### ***Bayesian correlation between mutualistic strategy and altitude, and mutualism strategy and entrance hole evolutionary rate***

To ask (i) do mutualism was lost following shifts to high altitude environments and (ii) do entrance hole morphorate evolution increased after shifts to high altitude, we fitted different Bayesian trait models implemented in the program *BayesTraits* v. 2 (24). The models require all characters to be binary. We thus coded *mutualism strategy* as mutualism present [merging generalist and specialized mutualists showed in Table 1] (“0”) and mutualism absent (“1”); *altitude* using maximal altitude, coding (“0”) species that lived below 1500 meters and (“1”) species living above 1500 m (we repeated the analysis using mean altitude determined based on over 1,100 herbarium specimen data points, which gave similar results); and finally, we coded the BAMM-inferred *entrance hole morphorate* as low (“0”) when it was comprised between 0 and 0.05 and high (“1”) when it was above 0.05. This cutoff was slightly above the mean of generalist morphorates but twice lower than the non-mutualist mean ( $\text{Mean}_{\text{Generalists}} = 0.043$ ;  $\text{Mean}_{\text{Non-mutualists}} = 0.1$ ), and thus appropriately separated high morphorates.

After pruning the outgroups, we used the maximum clade credibility (MCC) tree from BEAST. Using *BayesTraits* v. 2 (24), we ran three models of trait evolution in each case. The first ran a model of independent trait evolution ( $M_1$ ) estimating the four transition rate parameters  $\alpha_1$ ,  $\alpha_2$ ,  $\beta_1$ ,  $\beta_2$ , wherein double transitions from state 0,0 to 1,1 or from 0,1 to 1,0 are set to zero. We next ran a model of dependent trait evolution ( $M_2$ ) with eight parameters ( $q_{12}$ ,  $q_{13}$ ,  $q_{21}$ ,  $q_{24}$ ,  $q_{31}$ ,  $q_{34}$ ,  $q_{42}$ ,  $q_{43}$ ). Finally, we ran a dependent model of evolution where the non-mutualistic clades states were forced to be “low altitude and mutualism absent” and “low altitude and high entrance hole morphorate” ( $M_3$ ), respectively. However, this third approach was limited (underestimated) because 9 of the 12 losses are singletons, and therefore only three clades between 2 to 4 species representing three independent losses (Fig. 1) could be constrained. The significant difference in marginal likelihood of both  $M_3$  models (compared to  $M_2$ ) indicated that this approach was nevertheless useful. To

compare these non-nested models, we calculated the Bayes Factor score.

### ***Comparing niche space across mutualistic strategies***

To test the hypothesis that ‘generalist’ and ‘loss’ strategies have separate smaller niches embedded into the larger niche of specialised ant-plants, we generated a list of over 1,100 occurrence data for all species, subspecies, varieties and forms of Hydnophytinae. We first downloaded all information from the Global Biodiversity Information Facility (gbif, <http://www.gbif.org>) and cleaned each of data point, checking that the geographic and altitudinal range matched the protologue or description from refs. 14-22. The majority of the data (>70%) comes from herbarium specimens that were either cited within the aforementioned revisions, or viewed by the first author at Leiden (L), Kew (K) or Oxford (FHO). For some important specimens where GPS data was missing, we inferred it when sufficient geographic data was provided (e.g. 3 km NE of Sorong, Papua, Indonesia) on google maps (<https://maps.google.com/>).

We next downloaded all 19 bioclim variables (plus altitude) at 30 second resolution on WorldClim (<http://www.worldclim.org>). For each data point, we extracted the 19 bioclim variable values plus altitude using the function ‘extract’ from the R package ‘raster’ (27). We next generated a file with a single average value per bioclim variable for each species and subspecific form. Since using correlated variables can result in spurious results, we first determined the Pearson’s correlation coefficients between all 19 bioclim variables plus altitude. We then selected variables for analysis with a Pearson’s correlation coefficient < 0.5, taking a single variable in correlated clusters. The analyses were thus performed with bio\_2, bio\_3, bio\_13, bio\_15, bio\_18 and altitude. We used the R package vegan (28) to perform non-dimensional metric scaling analyses (NMDS) and used (i) the whole dataset and (ii) only the 76 species sampled in our phylogeny. We plotted the first analysis using the package ggplot2 (29). For the second analysis, we extracted the NMDS1 and NMDS2 values for each species, and used this data matched to the phylogeny tips as input data for a phylomorphospace that showed the ordination, phylogeny and mutualism strategies at once, using the function ‘phylomorphospace’ of the R package phytools (23).

### ***Inferring rates of entrance hole-diameter evolution using BAMM***

To assess the morphological rate of entrance hole evolution in the Hydnophytinae we first used the Bayesian time-dependent model implemented in BAMM v.2.5.0 (30), accounting for incomplete taxon sampling. We first log-transformed the entrance hole-diameter measures and then performed three BAMM runs with 1 million MCMC generations, sampling parameters every 10,000 generations. Morphorate, rate shift configurations, and macroevolutionary cohort matrix were plotted using the R package BAMMtools (31). After checking for convergence of the chains, we relied on Bayes factors to choose the best model.

### ***Hierarchical Bayesian Modeling***

To take into account phylogenetic distance in the analyses, we used a hierarchical

Bayesian (HB) approach for testing to test (i) whether mutualistic strategies significantly varied in altitude and (ii) whether mutualistic strategies significantly varied in entrance hole morphorate, while simultaneously correcting for phylogenetic signal. Our approach followed ref. 32.

Regression components of the model are the following:

$$\mu_{Altitude\ i} = \alpha_1 + \beta_1 \times S_{Generalist\ i}$$

$$\mu_{Altitude\ i} = \alpha_2 + \beta_2 \times S_{Specialized\ i}$$

$$\mu_{Altitude\ i} = \alpha_3 + \beta_3 \times S_{Loss\ i}$$

$$\mu_{Hole\ i} = \alpha_4 + \beta_4 \times S_{Generalist\ i}$$

$$\mu_{Hole\ i} = \alpha_5 + \beta_5 \times S_{Specialized\ i}$$

$$\mu_{Hole\ i} = \alpha_6 + \beta_6 \times S_{Loss\ i}$$

$$\mu_{Hole\ i} = \alpha_7 + \beta_7 \times \mu_{Altitude\ i}$$

$$\mu_{Rate\ i} = \alpha_8 + \beta_8 \times S_{Generalist\ i}$$

$$\mu_{Rate\ i} = \alpha_9 + \beta_9 \times S_{Specialized\ i}$$

$$\mu_{Rate\ i} = \alpha_{10} + \beta_{10} \times S_{Loss\ i}$$

$$\mu_{Rate\ i} = \alpha_{11} + \beta_{11} \times \mu_{Altitude\ i}$$

Where the terms  $\alpha$  refer to the intercept and  $\beta$  for the slope. We accounted for each mutualistic strategy by three dummy (binary) variables  $S_{Generalist\ i}$ ,  $S_{Specialized\ i}$ , and  $S_{Loss\ i}$ , where each taxa is coded absent “0” or present “1”. We used mean altitude ( $\mu_{Altitude\ i}$ ), entrance hole maximum diameter per species ( $\mu_{Hole\ i}$ ), and entrance hole morphorate (inferred using BAMM, see above,  $\mu_{Rate\ i}$ ), as dependent variables. To examine the relative effect sizes, all continuous variables were standardized by subtracting their mean and dividing by 2 SD before the analysis (33). We integrated phylogenetic information into the model using the Bayesian phylogenetic regression method of de Villemereuil et al. (ref. 34), by converting the 76 species-dated tree into a scaled (0-1) variance-covariance matrix, using the function ‘vcv.phylo’ of the ape package (35). We adapted the R script from ref. 30, where the model is parameterized using ‘JAGS’ package (36), into the R2JAGS package (37). We ran three parallel MCMC chains for 20,000 iterations followed by a 5000-iteration burn-in, and evaluated model convergence with the Gelman & Rubin (38) statistic using the ‘ggmcmc’ R package (39). Noninformative priors were specified for all parameter distributions, following ref. 32.

### ***Inferring rates of entrance hole diameter evolution using the non-censored rate test***

In addition to the Bayesian approach implemented in BAMM, we used a ML-based non-censored rate test (40) that employ a Brownian motion (BM) model to estimate and compare rates of entrance hole evolution under a one-rate model and under a three-rate (strategy-specific) model. We used again the log-transformed entrance hole diameter as input data (together with the tree, and a matrix of the mutualistic strategy). This method has been implemented in R in the ‘phytools’ package (23) using the function ‘brownieREML’. We used the Restricted Maximum Likelihood (REML) version to fit the Brownian rate variation model (non-censored) models, rather than the standard ML optimization since it has been shown to be both faster and unbiased (23). We compared these models using a likelihood ratio test, after



determining the critical  $X^2$  value at the 95% confidence level.

### ***Entrance hole morphological disparity-through-time plots***

To examine the time course of morphological variation independently from BAMM, we calculated disparity-through-time plots. We used the method developed by Harmon et al. (41), as implemented in the R package Geiger (42) which calculates disparity as average pairwise Euclidian distances between species, and this variance-related method of estimating the dispersion of points in multivariate space has been shown to be insensitive to sample size (39). We used the Geiger function ‘*dtm*’ (disparity-through-time) and run 1000 simulations to calculate the null distribution-through-time distribution. By removing taxa in the tree, we performed several ‘experiments’ to examine disparity-through-time (i) for all Hydnophytinae, (ii) for all Hydnophytinae except the specialists, (iii) for all Hydnophytinae except the non-mutualists and (iv) for the specialist subclade *Myrmecodia* alone.

### ***Mapping morphological evolutionary rate in New Guinea***

To identify hotspots of morphological evolutionary rate, we developed a method to infer rates of morphological evolution using (i) a morphological rate analysis in BAMM (30) and (ii) a matrix of GPS coordinates for all specimens for each species sampled in the tree used in the BAMM analysis. To do so, we retrieved morphorate from each tip from the BAMM analyses using the function “GetTipsRates” in BAMMtools v.2.1 (31). Rates were interpolated to a polygon representing mainland New Guinea [politically split in Indonesian Papua (western part) and Papua New Guinea (eastern part)], using the Inverse Distance Weight method implemented in the software ArcMap v.9.3 (43).

## **References**

1. Chomicki G, Renner SS (2016) Evolutionary relationships and biogeography of the ant-epiphytic genus *Squamellaria* (Rubiaceae: Psychotriaceae) and their taxonomic implications. *PloS one* 11(3):e0151317.
2. Huxley CR, Jebb MHP (1991) The tuberous epiphytes of the Rubiaceae 2: the new genus *Anthorrhiza*. *Blumea* 36(1):21-41.
3. Huxley CR, Jebb MHP (1991) The tuberous epiphytes of the Rubiaceae 3: A revision of *Myrmephytum* to include *Myrmedoma*. *Blumea* 36(1):43-52.
4. Huxley CR, Jebb MHP (1993) The tuberous epiphytes of the Rubiaceae 5. A revision of *Myrmecodia*. *Blumea* 37(2):271-334.
5. Barrabé L, Maggia L, Pillon Y, Rigault F, Mouly A, Davis AP, Buerki S (2014) New Caledonian lineages of *Psychotria* (Rubiaceae) reveal different evolutionary histories and the largest documented plant radiation for the archipelago. *Mol Phylogenet Evol* 71:15-35.
6. Katoh K, Standley DM (2013) MAFFT multiple sequence alignment software version 7: improvements in performance and usability. *Mol Biol Evol* 30(4):772-780.
7. Maddison WP, Maddison DR (2011) Mesquite: a modular system for evolutionary analysis. Version 2.75. Available at:

[mesquiteproject.org/mesquite/download/download.html](http://mesquiteproject.org/mesquite/download/download.html).

8. Stamatakis A (2014) RAxML version 8: a tool for phylogenetic analysis and post-analysis of large phylogenies. *Bioinformatics* 30(9):1312-1313.
9. Ronquist F, Teslenko M, van der Mark P, Ayres DL, Darling A, Höhna S, Larget B, Liu L, Suchard MA, Huelsenbeck JP (2012) MrBayes 3.2: efficient Bayesian phylogenetic inference and model choice across a large model space. *Syst Biol* 61(3):539-542.
10. Darriba D, Taboada GL, Doallo R, Posada D (2012) jModelTest 2: more models, new heuristics and parallel computing. *Nat methods* 9(8):772-772.
11. Bouckaert R, Heled J, Kühnert D, Vaughan T, Wu CH, Xie D, Suchard MA, Rambaut A, Drummond AJ. (2014) BEAST 2: a software platform for Bayesian evolutionary analysis. *PLoS Comput Biol* 10(4):e1003537.
12. Rambaut A, Suchard M, Xie W, Drummond, A., 2014. Tracer v. 1.6. Institute of Evolutionary Biology, University of Edinburgh.
13. Rambaut A (2012) FigTree 1.4. *Institute of Evolutionary Biology, University of Edinburgh*.
14. Huxley CR (1978) The ant-plants *Myrmecodia* and *Hydnophytum* (Rubiaceae), and the relationships between their morphology, ant occupants, physiology and ecology. *New Phytologist* 80(1):231-268.
15. Chomicki G, Renner SS (2016) Obligate plant farming by a specialized ant. *Nat Plants* 2:16181.
16. Chomicki G, Renner SS (2016) Evolutionary relationships and biogeography of the ant-epiphytic genus *Squamellaria* (Rubiaceae: Psychotrieae) and their taxonomic implications. *PloS one* 11(3):e0151317.
17. Jebb MHP (1985) *Taxonomy and tuber morphology of the rubiaceous Ant-Plants*. Doctoral dissertation, University of Oxford.
18. Huxley CR, Jebb MHP (1991) The tuberous epiphytes of the Rubiaceae 3: A revision of *Myrmephytum* to include *Myrmedoma*. *Blumea* 36(1):43-52.
19. Huxley CR, Jebb MHP (1991) The tuberous epiphytes of the Rubiaceae 2: the new genus *Anthorrhiza*. *Blumea* 36(1):21-41.
20. Huxley CR, Jebb MHP (1993) The tuberous epiphytes of the Rubiaceae 5. A revision of *Myrmecodia*. *Blumea* 37(2):271-334.
21. Jebb MHP (1991) Cavity structure and function in the tuberous Rubiaceae. pp. 374-390. In Huxley CR and Cutler DF eds. *Ant-plant interactions*. Oxford: Oxford University Press.
22. Huxley CR, Jebb MHP (1991) The tuberous epiphytes of the Rubiaceae 1: a new subtribe, the Hydnophytinae. *Blumea* 36(1):1-20.
23. Revell LJ (2012) phytools: an R package for phylogenetic comparative biology (and other things). *Methods Ecol Evol* 3(2):217-223.
24. Pagel M, Meade A (2013) BayesTraits, version 2. *Univ. of Reading, Berkshire, UK*  
Available at <http://www.evolution.rdg.ac.uk>
25. Bollback JP (2006) SIMMAP: stochastic character mapping of discrete traits on phylogenies. *BMC Bioinformatics* 7(1):88.
26. Ripley B, Venables B, Bates DM, Hornik K, Gebhardt A, Firth D, Ripley MB (2013) Package 'MASS'. CRAN Repository. <http://cran.r-project.org/web/packages/MASS/MASS.pdf>.

27. Hijmans RJ, Van Etten J (2013) Raster: geographic data analysis and modeling. R package version 2.1-49.
28. Oksanen J, Blanchet FG, Kindt R, Legendre P, Minchin PR, O'Hara RB, Simpson GL, Solymos P, Stevens MHH, Wagner H, Oksanen MJ (2013) Package 'vegan'. *Community ecology package, version, 2*(9).
29. Wickham H (2009) *ggplot2: elegant graphics for data analysis*. Springer Science & Business Media.
30. Rabosky DL (2014) Automatic detection of key innovations, rate shifts, and diversity dependence on phylogenetic trees. *PLoS One* 9:e89543.
31. Rabosky DL, et al. (2014) BAMMtools: An R package for the analysis of evolutionary dynamics on phylogenetic trees. *Methods Ecol Evol* 5:701–707.
32. Fridley JD, Craddock A (2015) Contrasting growth phenology of native and invasive forest shrubs mediated by genome size. *New Phytol* 207(3):659-668.
33. Gelman A, Hill J (2007) *Data analysis using regression and multilevel/hierarchical models*. Cambridge, UK: Cambridge University Press.
34. de Villemereuil P, Wells JA, Edwards RD, Blomberg SP (2012) Bayesian models for comparative analysis integrating phylogenetic uncertainty. *BMC Evolut Biol* 12(1): 102.
35. Paradis E, Claude J, Strimmer K (2004) APE: analyses of phylogenetics and evolution in R language. *Bioinformatics* 20(2):289-290.
36. Plummer M (2003) JAGS: a program for analysis of Bayesian graphical models using Gibbs sampling. In: Hornik K, Leisch F, Zeileis A, eds. *Proceedings of the 3rd International Workshop on Distributed Statistical Computing (DSC 2003)*. Vienna, Austria: Achim Zeileis.
37. Su Y-S, Yajima M (2014) R2jags: a package for running JAGS from R. R package version 0.04-03. [WWW document] URL <http://CRAN.R-project.org/package=R2jags>.
38. Gelman, A. and Rubin, D.B., 1992. Inference from iterative simulation using multiple sequences. *Statistical science* 7(4):457-472.
39. I Marín XF (2013) ggmcmc: Graphical tools for analyzing Markov Chain Monte Carlo simulations from Bayesian inference. URL: <http://xavier-fim.net/packages/ggmcmc>
40. O'Meara BC, Ané C, Sanderson MJ, Wainwright PC (2006) Testing for different rates of continuous trait evolution using likelihood. *Evolution* 60(5):922-933.
41. Harmon LJ, Schulte JA, Larson A, Losos JB (2003) Tempo and mode of evolutionary radiation in iguanian lizards. *Science* 301(5635):961-964.
42. Harmon LJ, Weir JT, Brock CD, Glor RE, Challenger W (2008) GEIGER: investigating evolutionary radiations. *Bioinformatics* 24(1):129-131.
43. Environmental Systems Research Institute (2008) ArcGIS Desktop 9, ArcView 9.3, (Environmental Systems Research Institute, Redlands, CA).

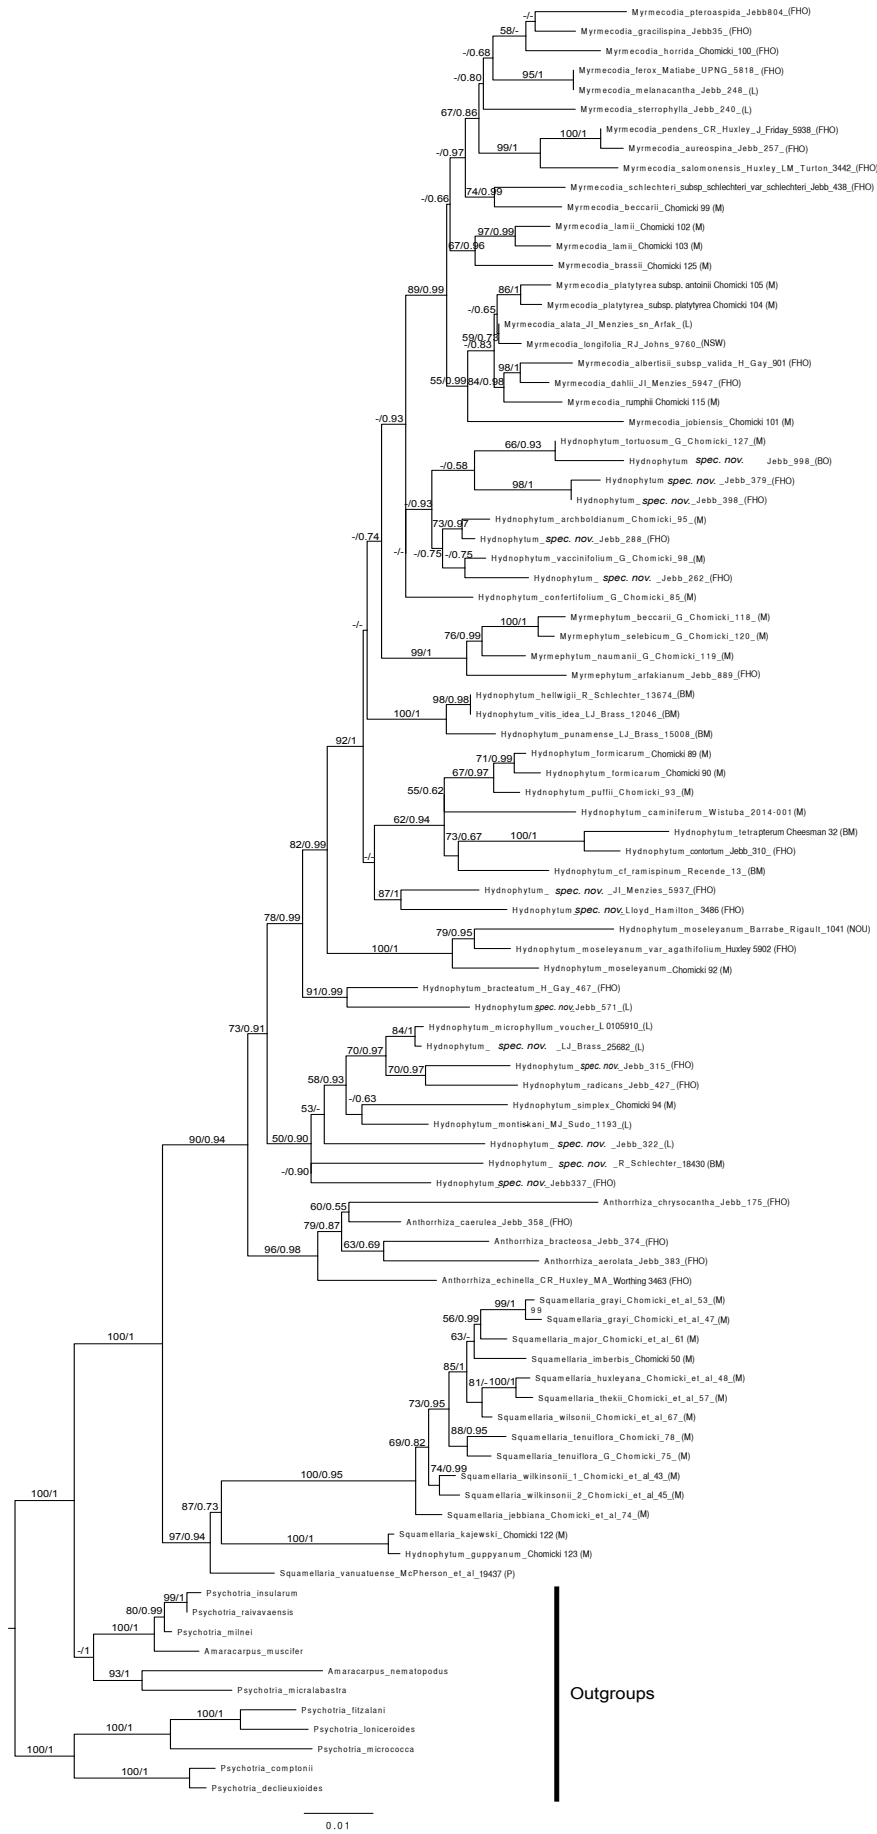

**Figure S1.** Maximum likelihood tree for the Hydnophytinae. Numbers above branches show the bootstrap support from 100 replicates, and the posterior probabilities from a Bayesian analysis.

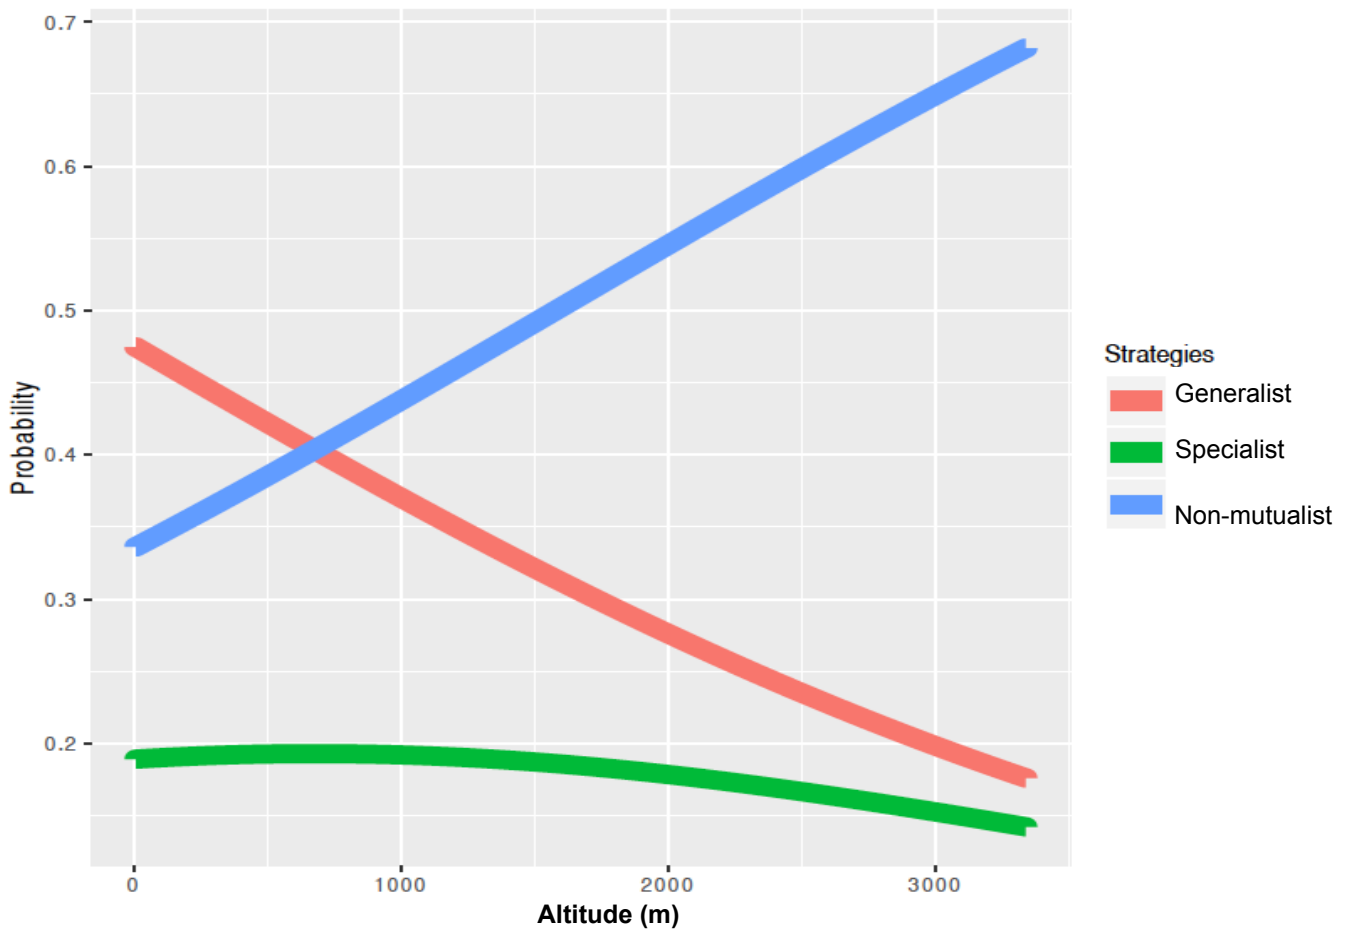

**Figure S2.** Multinomial logistic regression ( $t = 2.0$ ,  $AIC = 270$ ) of mean altitude on mutualistic strategy, calculated for each Hydnophytinae taxon (including subspecific forms, 130 taxa in total), from over 1,100 occurrence data points.

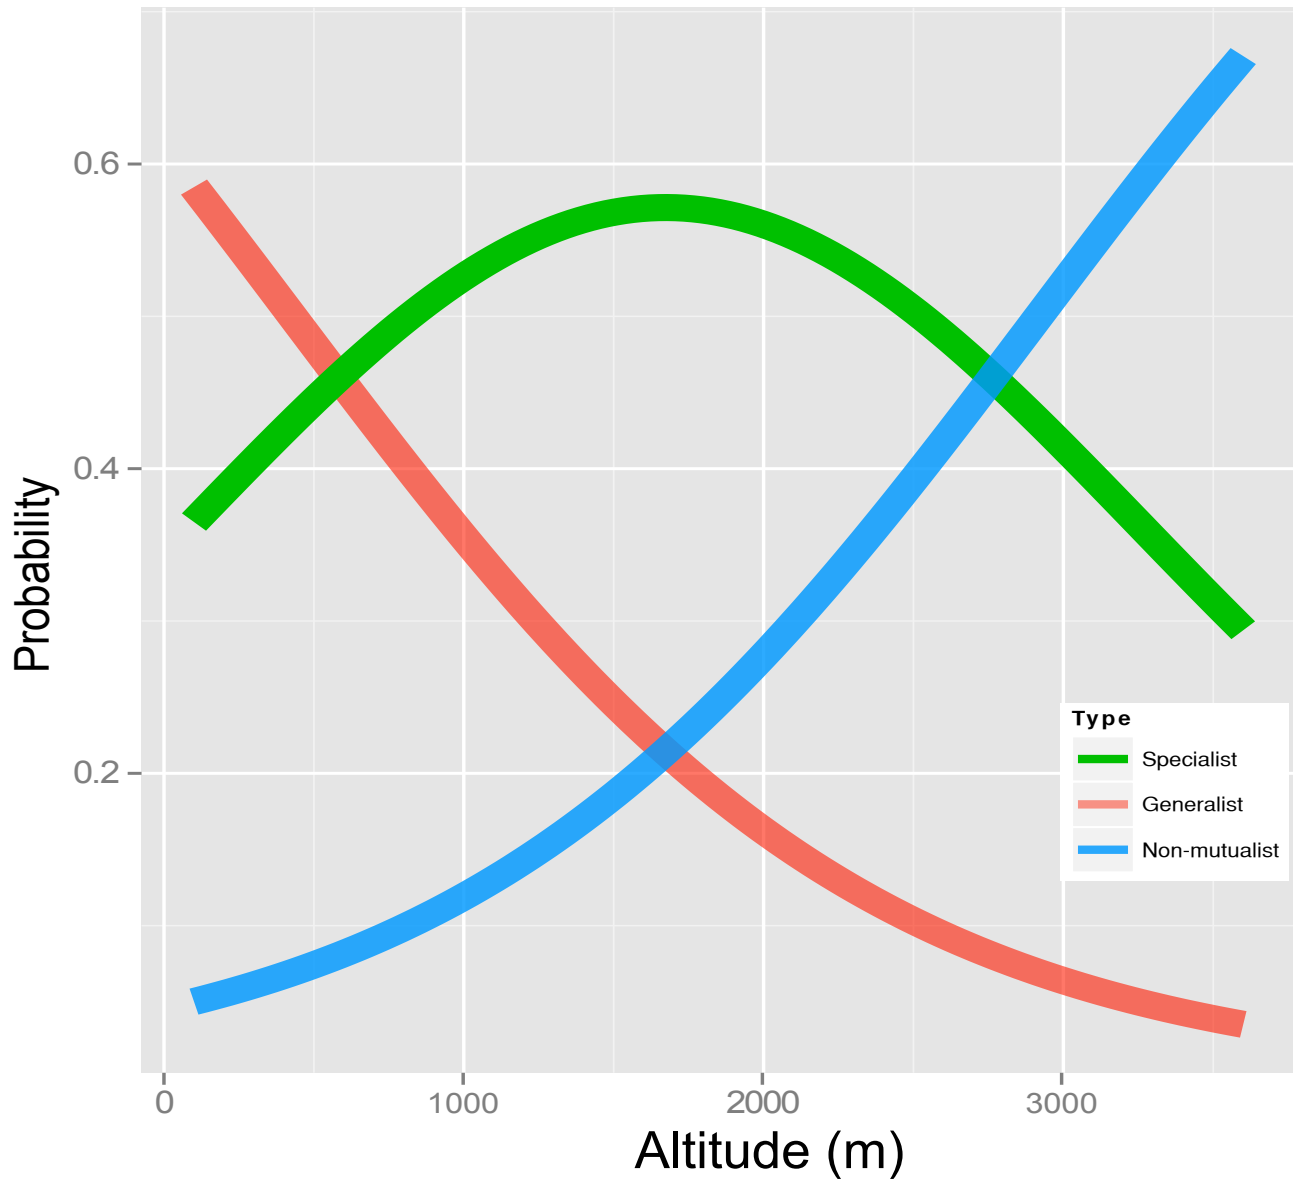

**Figure S3.** Multinomial logistic regression ( $t = 4.42$ ,  $AIC = 233.1$ ) of maximum altitude on mutualistic strategy, using each Hydnophytinae taxon sampled in our tree.

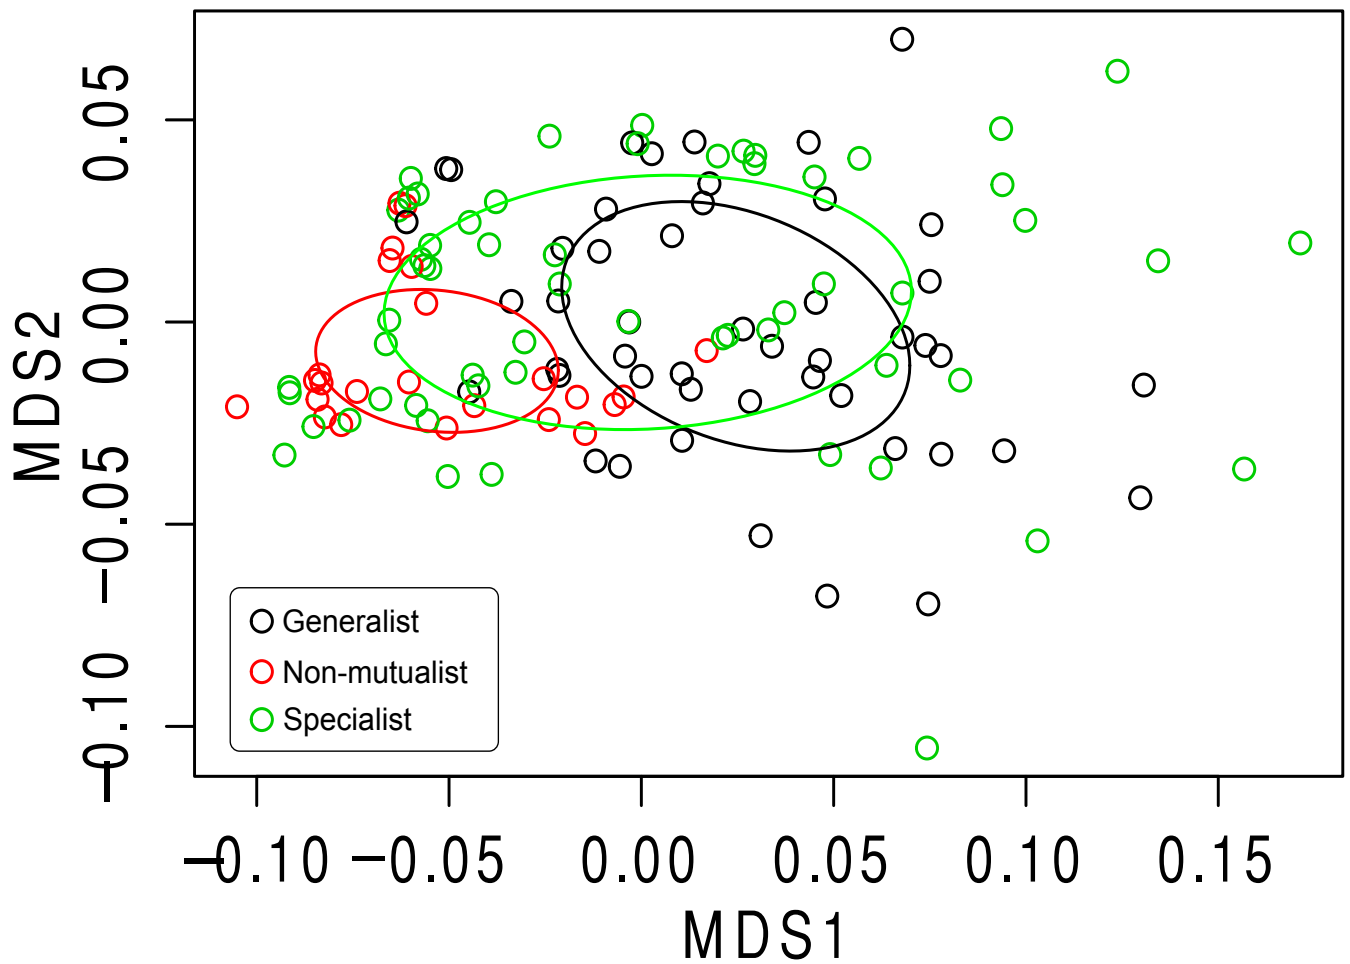

**Figure S4.** Non-dimensional metric scaling analysis (NDMS) showing the climatic niche space of the three mutualistic strategies in the Hydnophytinae. Ellipses show the 95% confidence intervals for each strategy. This analysis is based on all species, subspecies and varieties (130 taxa). A large dataset of over 1,100 occurrences was compiled, and we then took the mean for Altitude or each bioclim variable. We excluded all variables that were correlated among themselves (Pearson's correlation coefficient > 0.5) and only kept a single variable per cluster. This analysis is based on bio\_2, bio\_3, bio\_13, bio\_18 and altitude.

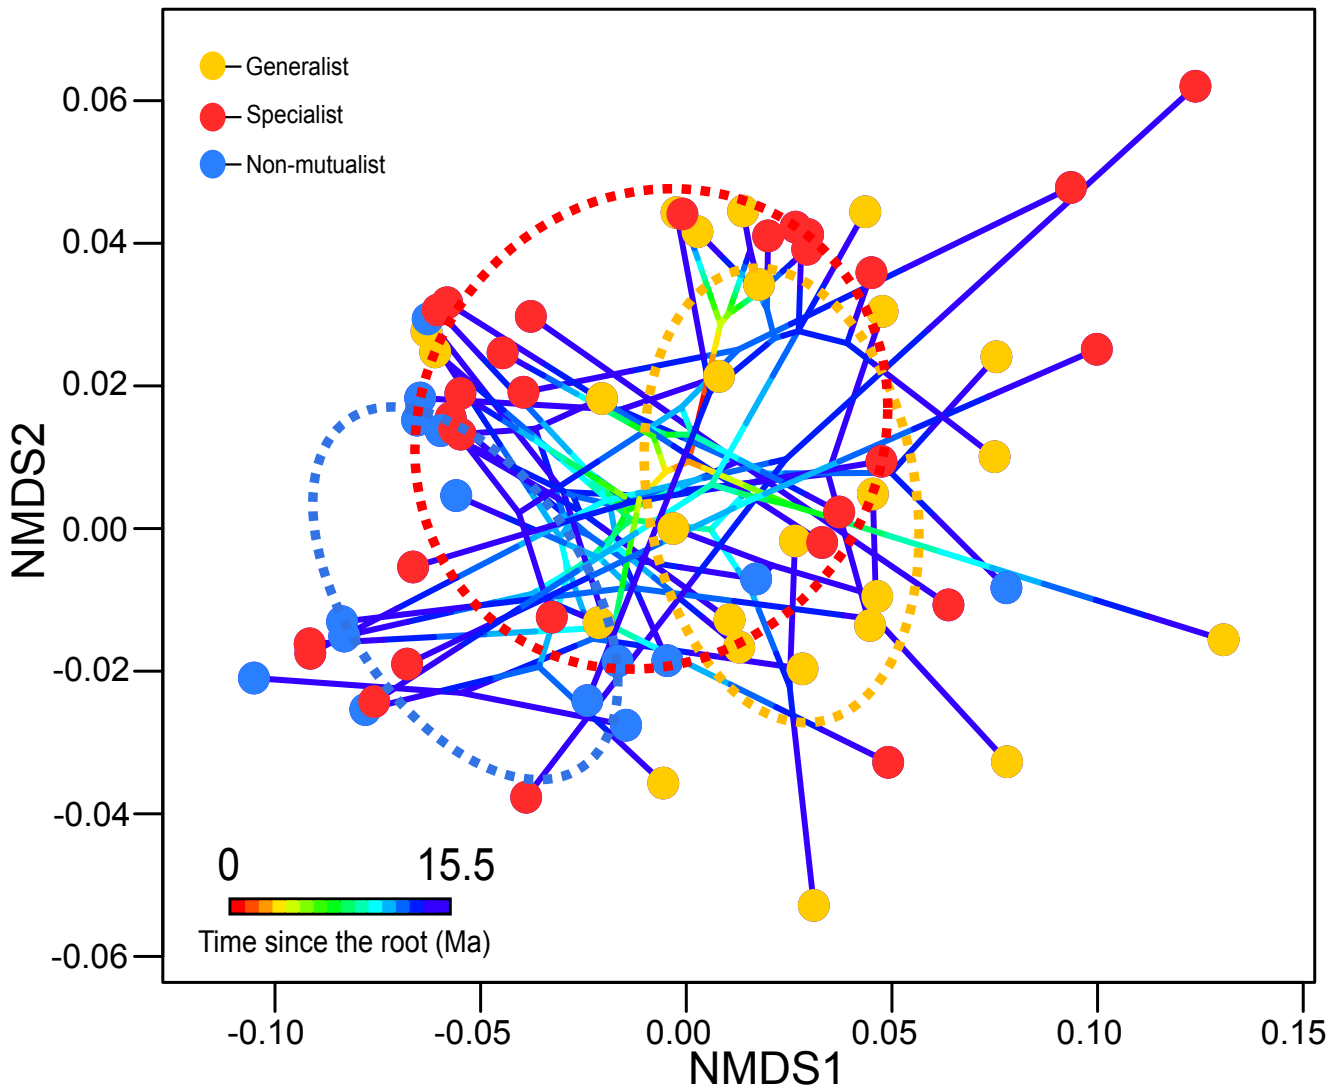

**Figure S5.** Phylomorphospace showing the non-metric multidimensional scaling (NMDS) analysis of species' climatic niches (Supplementary Materials and Methods). Dashed ellipses show the 95% intervals, highlighting that 'generalists' and 'non-mutualists' form discrete clusters (niche spaces) that are embedded in the larger cluster of 'specialist'. Compare with Figure S4.



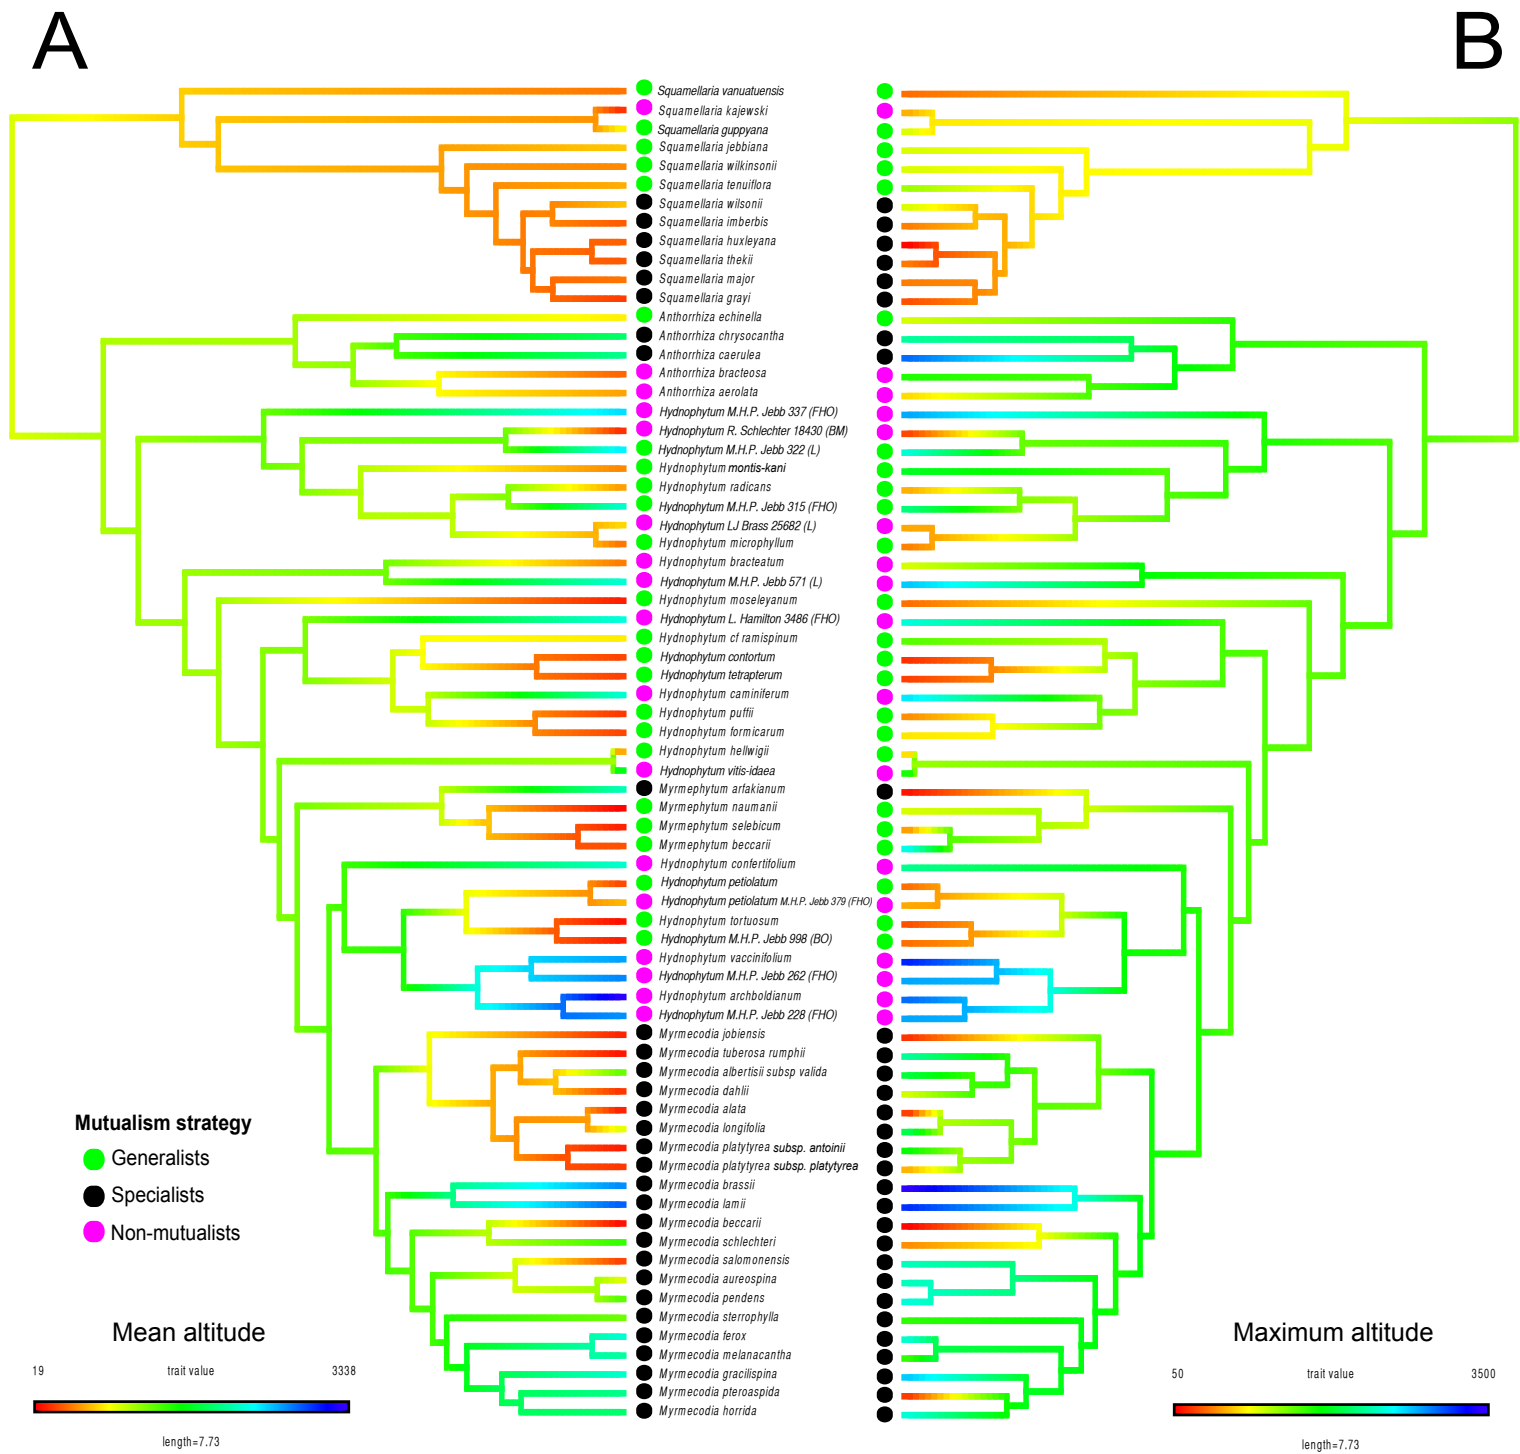

**Figure S6.** Ancestral state reconstruction of altitude as a continuous character in the Phytools package. (A) Mean altitude calculated based on over 1,100 occurrence data points. (B) Maximum altitudinal range taken from the literature (see Materials and Methods).

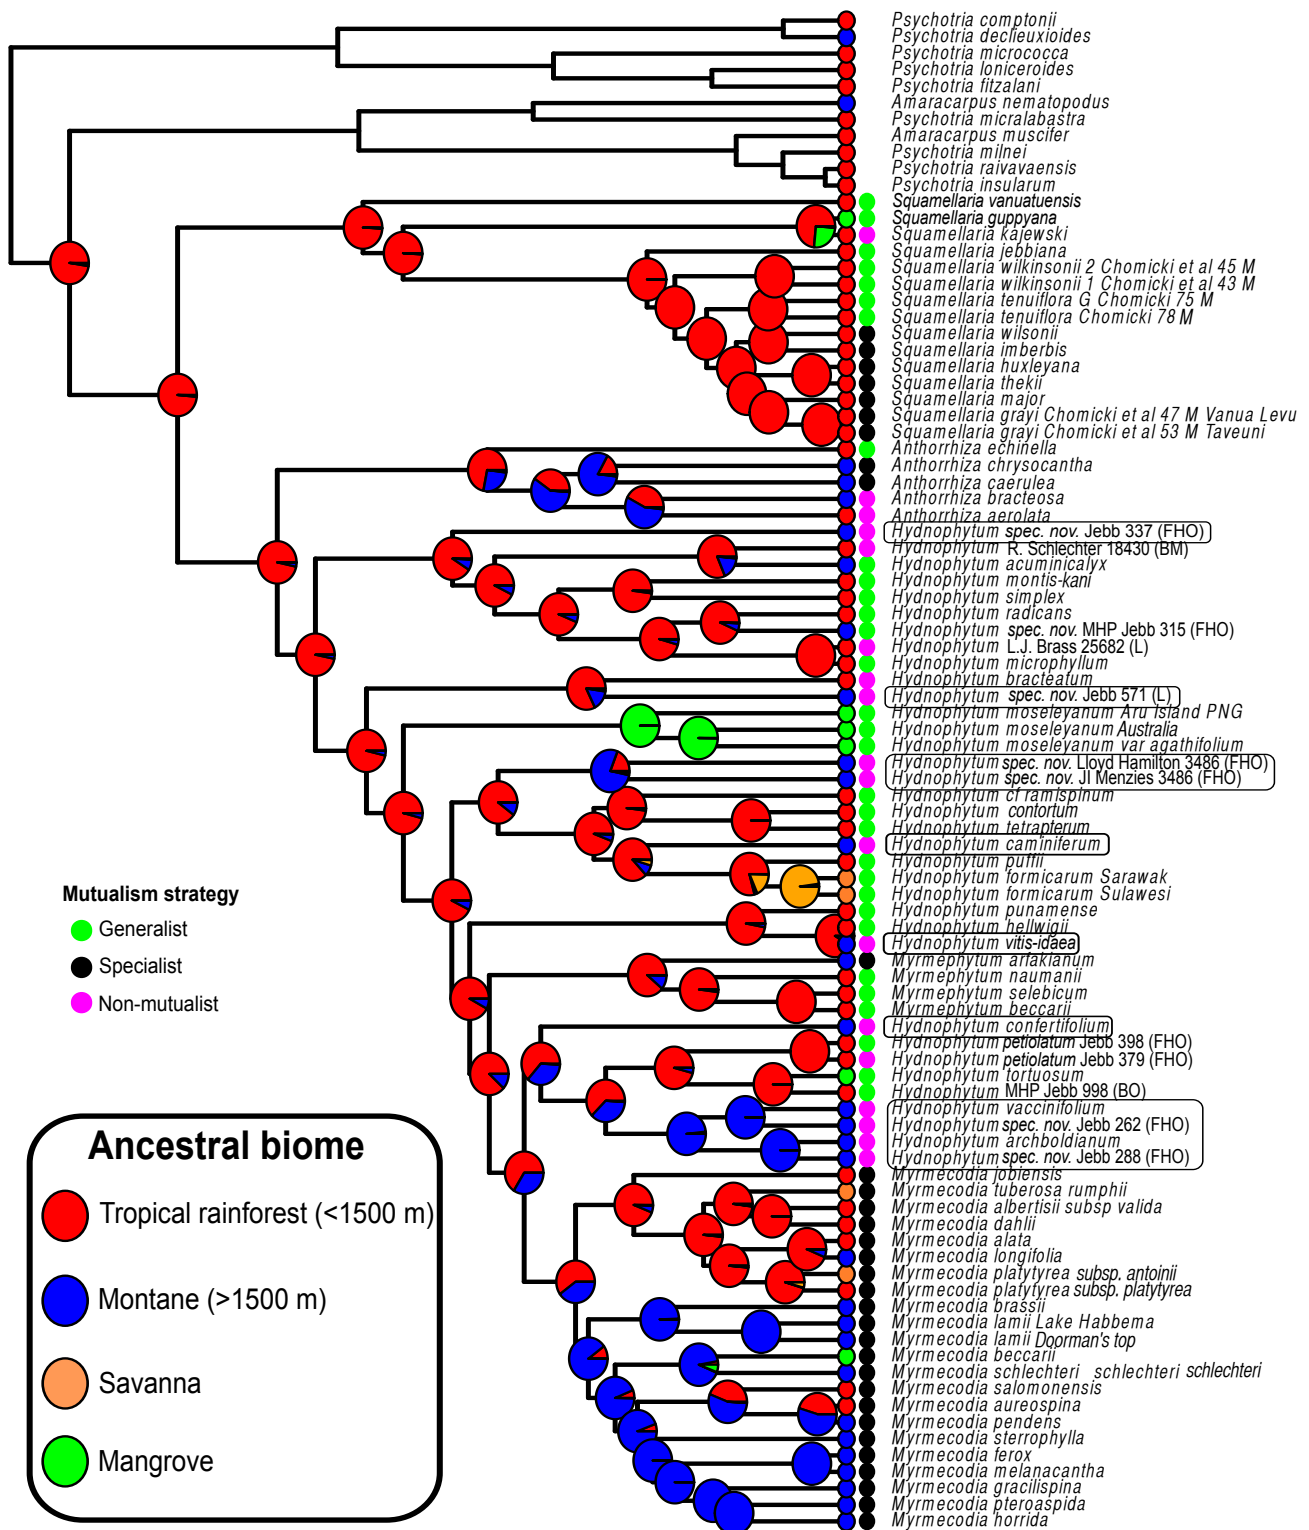

**Figure S7.** Ancestral state reconstruction of species occurrence using stochastic mapping in the Phytools package. Rectangles highlight the lineages where loss of mutualism with ants is correlated with shift to montane habitat. For coding, see Materials and Methods. Mutualism strategy is shown for comparison (ingroups only).

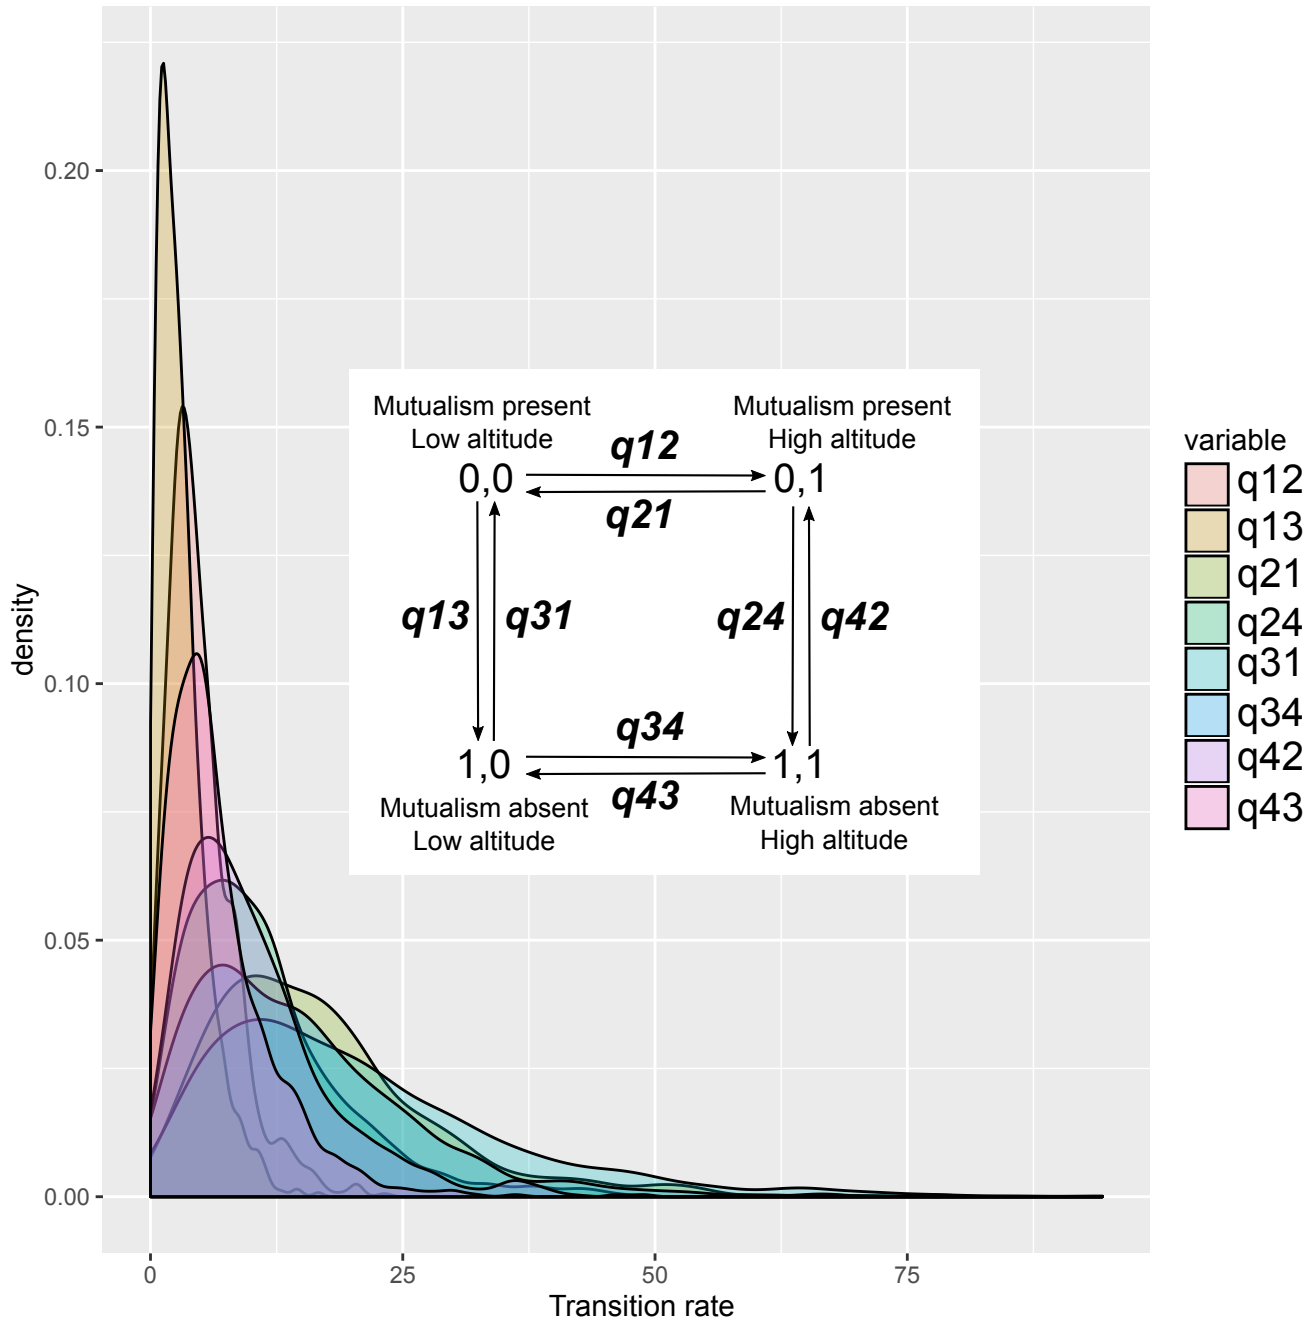

**Figure S8.** Transition rate parameters of a Bayesian analysis of the evolution of mutualistic strategy and altitude (correlated evolution).

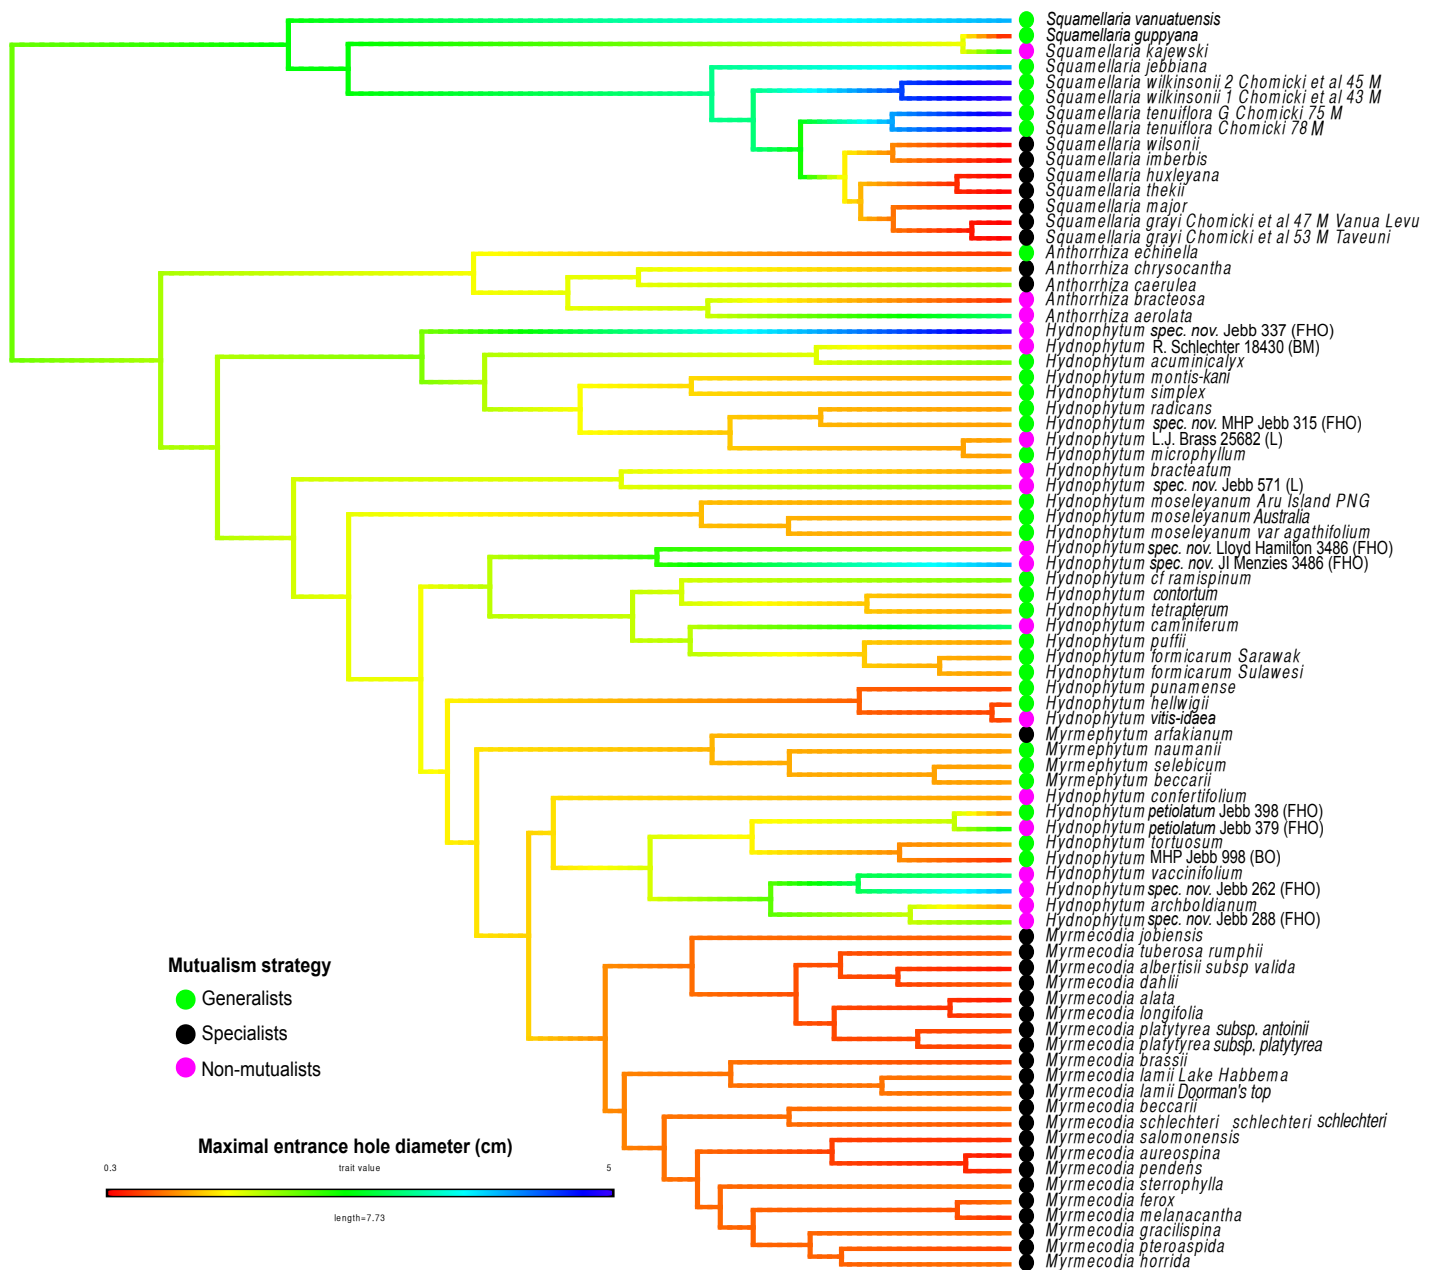

**Figure S9.** The evolution of domatium entrance hole size in the Hydnophytinae. Ancestral state reconstruction of entrance hole size using the functions 'fastAnc' and 'contMap' in the Phyttools package.

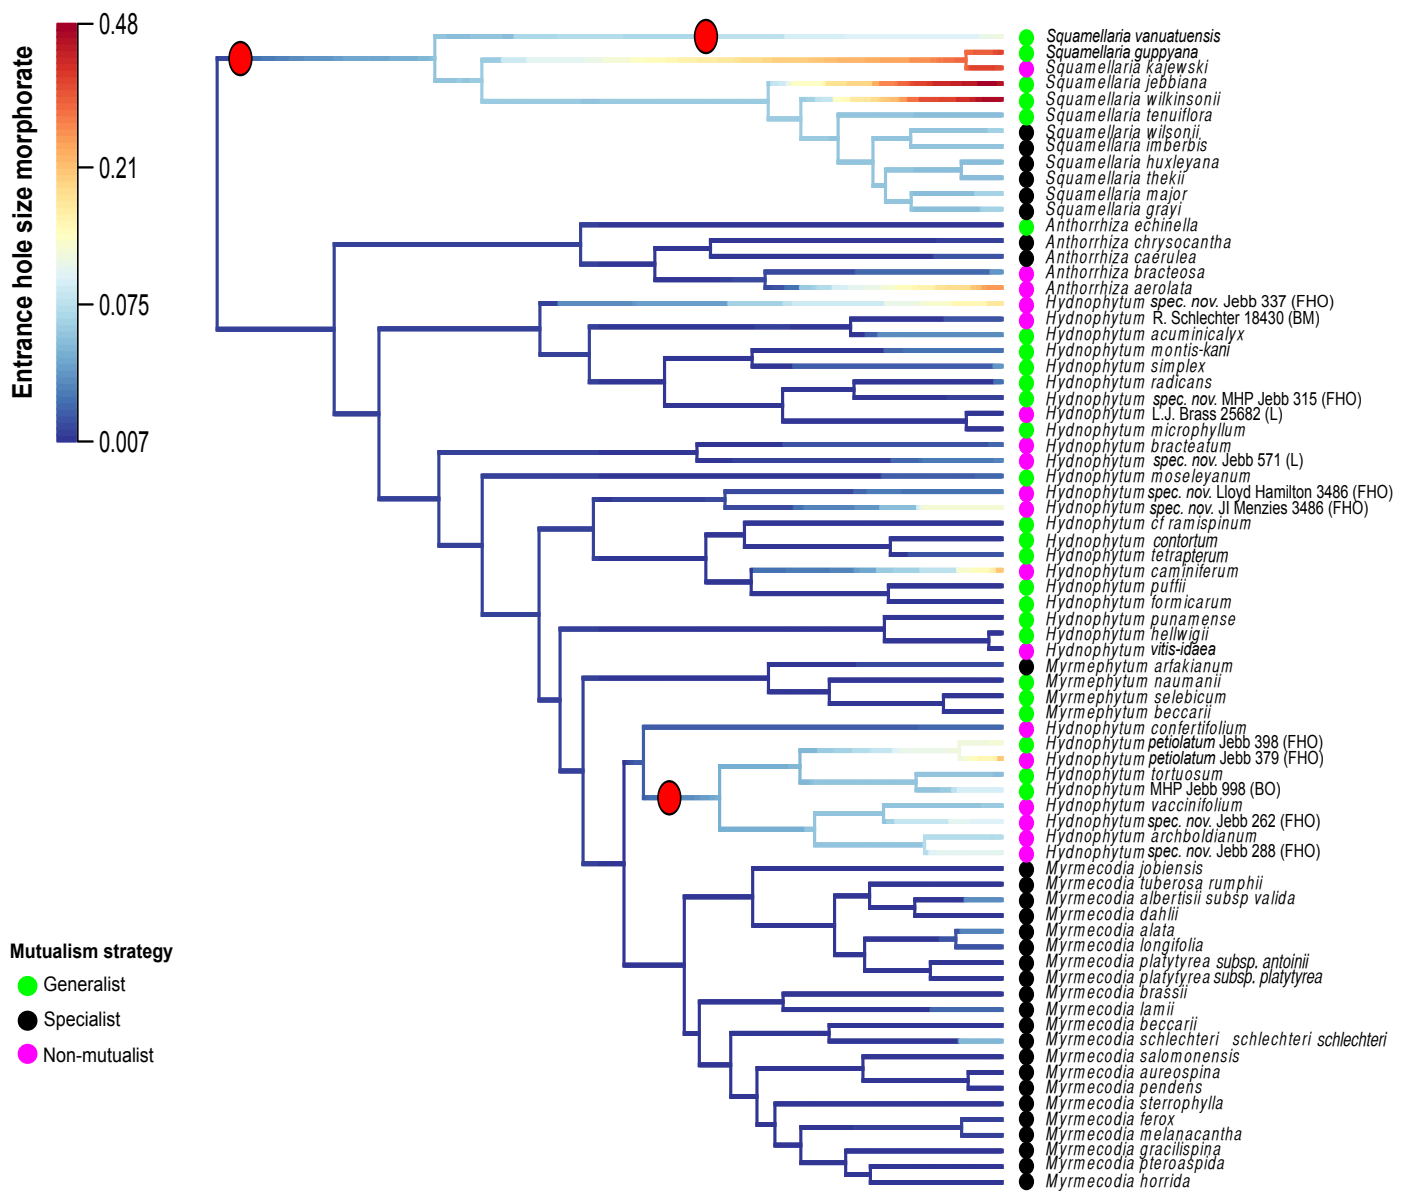

**Figure S10.** Phylorate plot showing the rate of entrance hole size evolution inferred using 'Bayesian Analysis of Macroevolutionary Mixtures' (BAMM). Settings are details in the Materials and Methods section. Red dots show the most significant rate shifts.

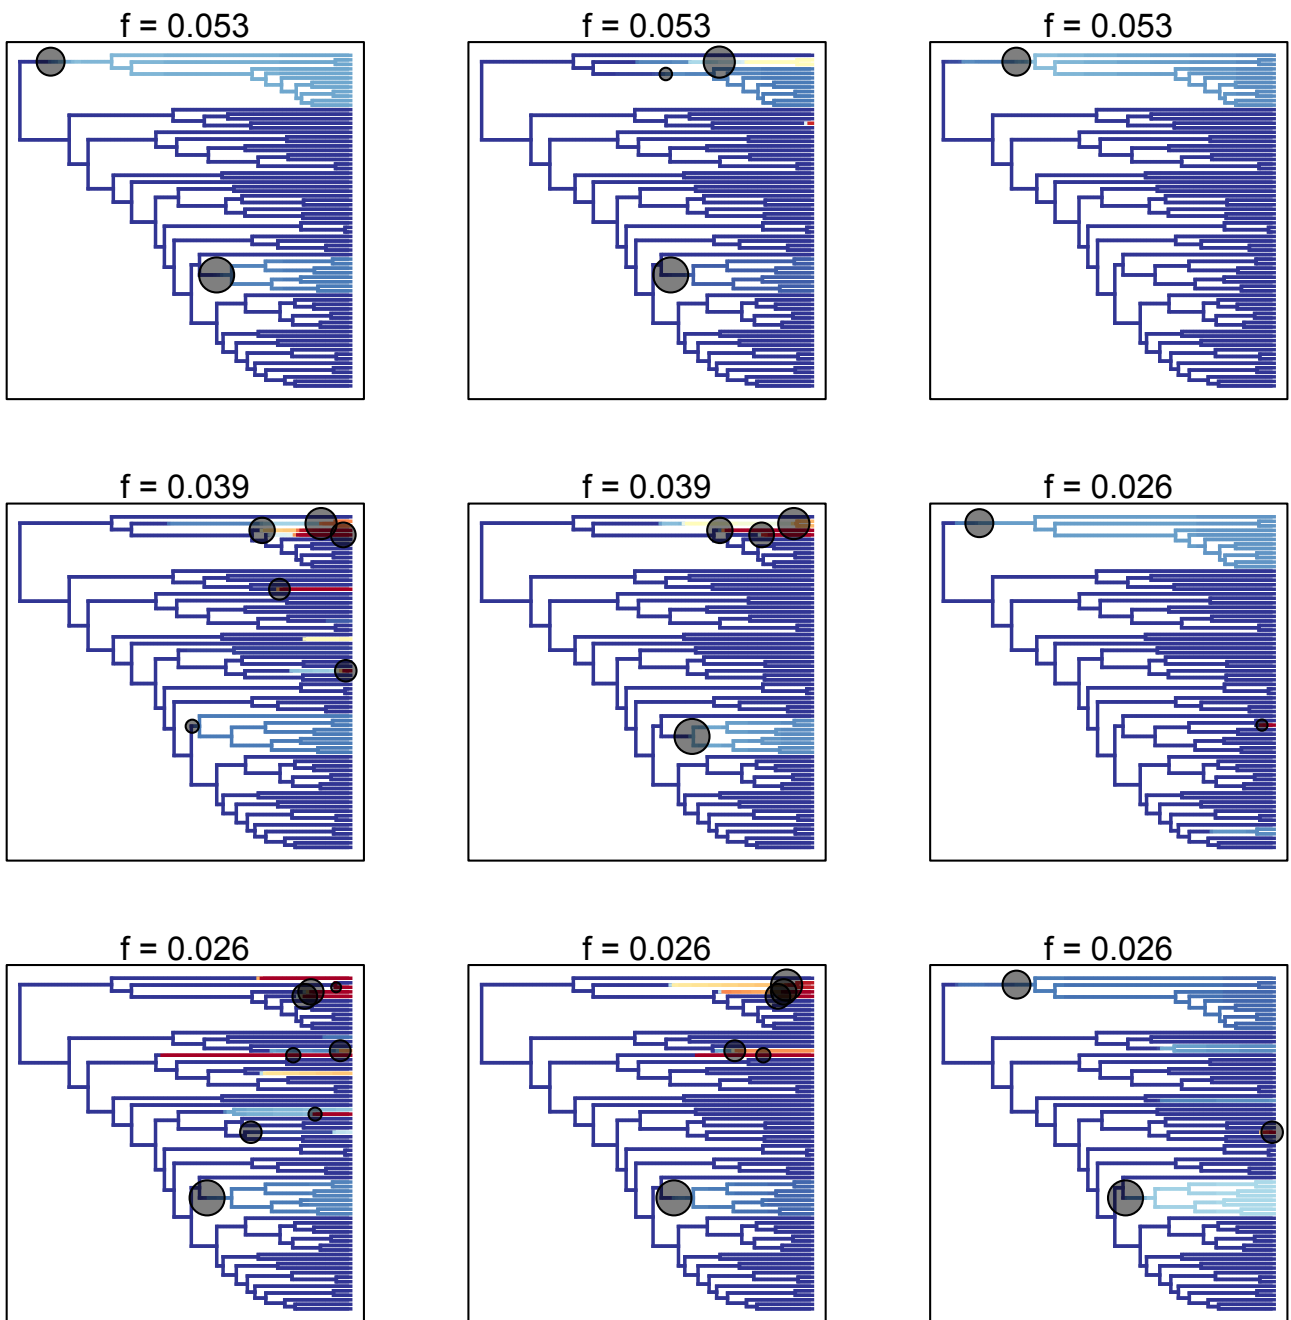

**Figure S11.** Credible shift set in domatium entrance hole size evolutionary rate inferred in BAMM. Each black dot shows a shift in morphological rate with diameter proportional to posterior probability.

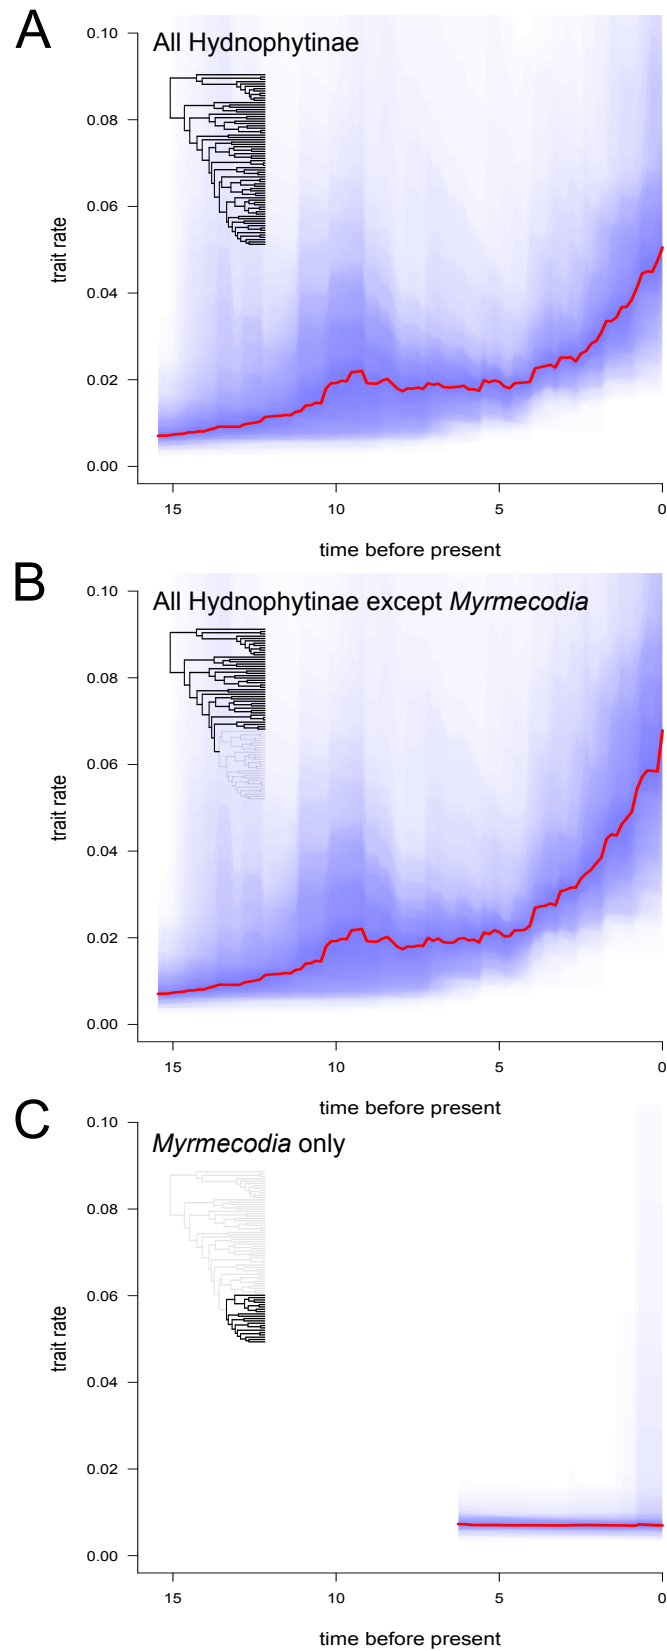

**Figure S12.** Entrance hole size morphorate-through-time plots inferred in BAMM. (A) All Hydnohytinae. (B) All Hydnohytinae except *Myrmecodia*, the largest clade of specialized mutualists. (C) *Myrmecodia* only. Note that when excluding *Myrmecodia* in (B), the morphorate towards the present is higher as compared to (A). Shading intensity reflects the posterior probability density.

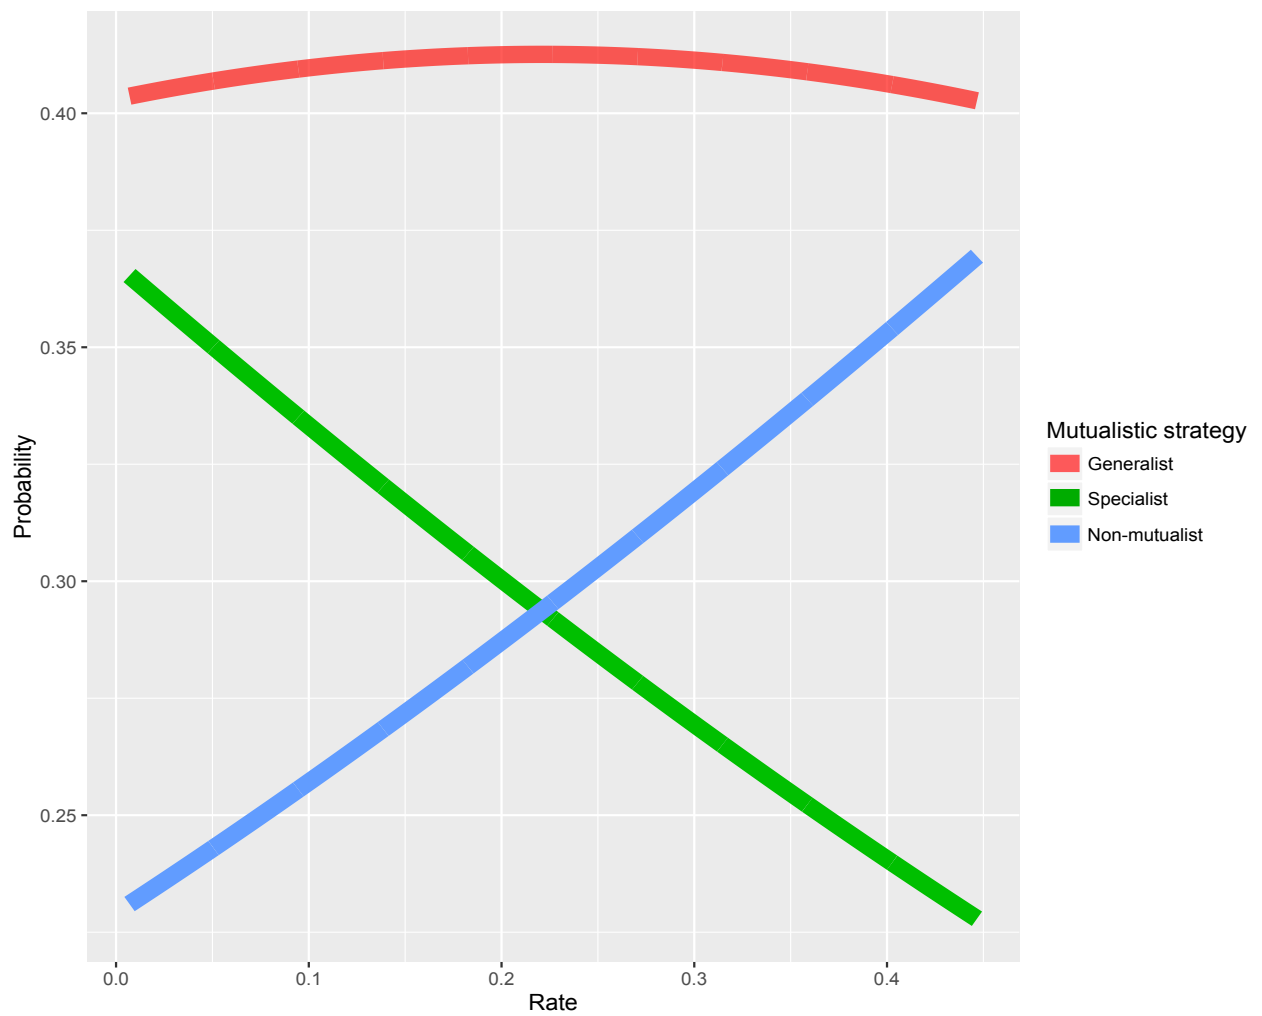

**Figure S13.** Multinomial logistic regression of the BAMM-inferred entrance hole size morphorate on mutualistic strategies (t-value = 0.59, AIC =165.1; t-value<sub>Generalists | Specialists</sub> = -2.0; t-value<sub>Specialists | Non-mutualists</sub> = 4.0).



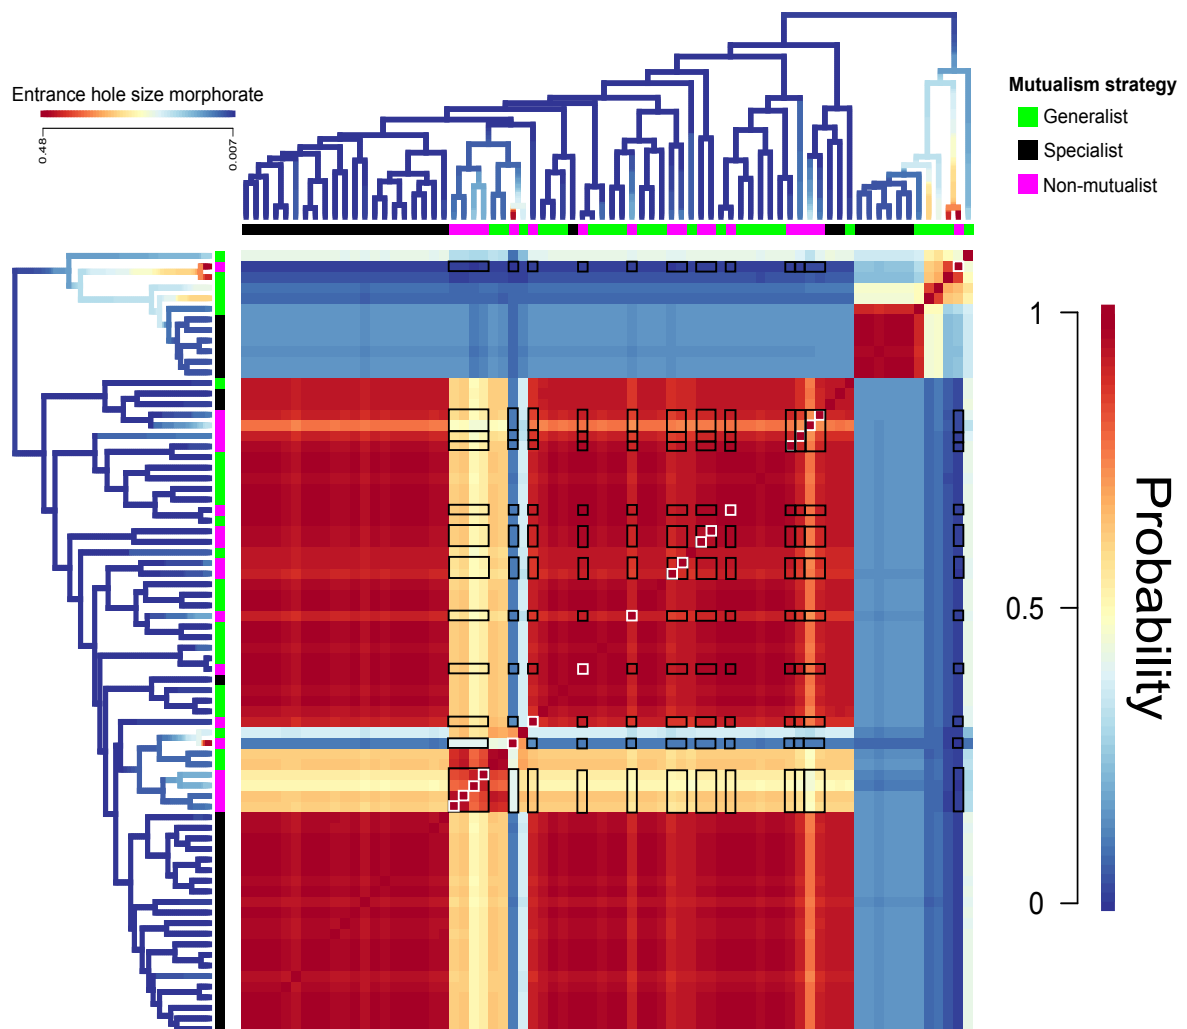

**Figure S14.** Macroevolutionary cohort matrix showing the pairwise probabilities that any two species share the same rate of entrance hole evolution. The plot shows the inferred rate of entrance hole evolution. Black squares compare non-mutualists, while white squares indicate autocorrelation. This shows that most non-mutualists share the same evolutionary dynamics.

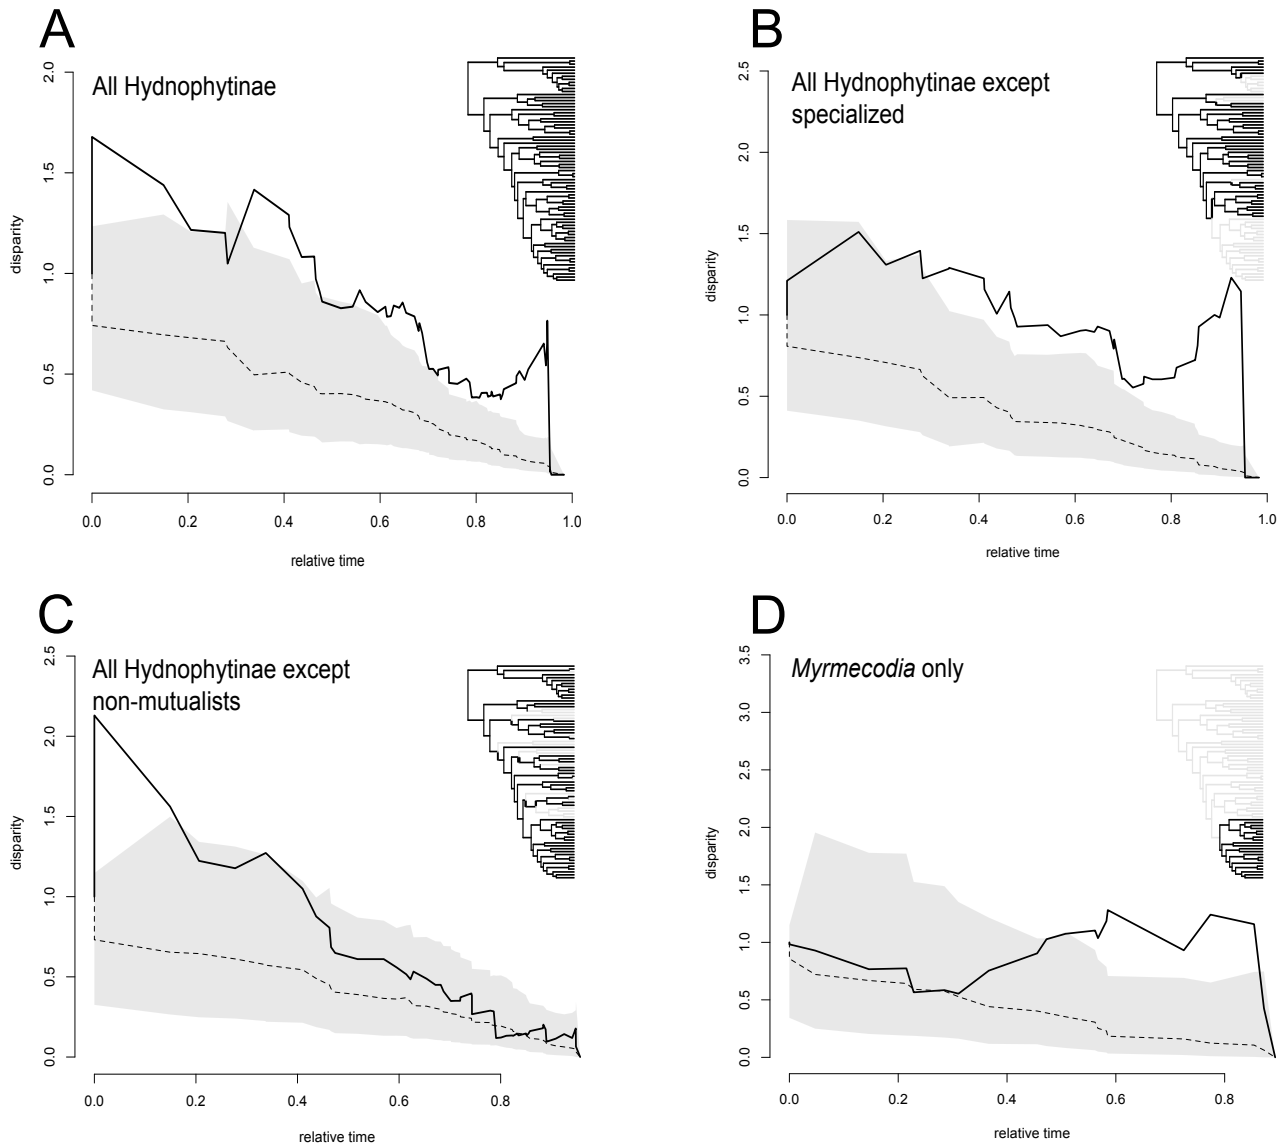

**Figure S15.** Entrance hole size disparity-through-time (DTT) plots inferred in the R package Geiger. (A) All Hydnohytinae. (B) All Hydnohytinae except specialized mutualists. (C) All Hydnohytinae except non-mutualists. (D) *Myrmecodia* only. The solid black line shows empirical DTT plots based on log-normalized entrance-hole diameter, while the dotted line shows a null DTT plot based on Brownian motion alone, with the grey shading representing the 95% confidence intervals.

**Table S1.** Mutualistic traits in the Hydnophytinae. Each species was coded based on the cited references, an ongoing revision of *Hydnophytum* from M. Jebb and C.R. Huxley, and field data from Camilla Huxley (fieldwork in Papua New Guinea in the 1970's and 1980's), Matthew Jebb (fieldwork in Papua New Guinea and Indonesian Papua in the 1980's and 1990's), Milan Janda (Papua New Guinea 2004-2014), Eva Kaufmann (South East Asia, Borneo, Indonesia 1998-2001), the mission Santo 2006 to Vanuatu ([https://fr.wikipedia.org/wiki/Expédition\\_Santo\\_2006](https://fr.wikipedia.org/wiki/Expédition_Santo_2006)), in particular Jérôme Orivel who collected ant-plants and their ant partners, and Guillaume Chomicki (field trips to Fiji in 2014, 2015 and 2016). The following table shows major mutualistic traits of the Hydnophytinae: (i) maximal entrance hole size, which controls partner's entry inside the domatium, and thus symbiosis with ants; (ii) post-anthetic sugar rewards for specialized ant partners (Chomicki et al., 2016); (iii) dispersal mode by birds, (Dolichoderinae) ants alone, or ants and birds (Chomicki and Renner, 2016); the presence or absence of warts, micro-structures inside the domatium that absorb ant-brought nutrients (Huxley, 1978), and (v) tuber growth that can be apical or diffuse. We here define strategy based on the tuber (domatium) inhabitants, with 'generalists' being inhabited by any unspecialized arboreal or polymorphic-nesting ants; 'specialists' being mainly inhabited by one or two Dolichoderinae ant species from the genera *Pholidris* or/and *Anomychomyrma*, and 'non-mutualists', those that are not inhabited by ants, but can harbor other inhabitants. This does not exclude that some specialists (mostly *Myrmecodia*) can be occasionally occupied by a generalist ant species (typically if a bird disperses the seeds too far from Dolichoderinae-inhabited ant-plants), and conversely, that some generalist Hydnophytinae are also occasionally occupied by *Pholidris* and *Anomychomyrma* species. For most generalist species, there are no quantitative studies looking at the ant inhabitants, and thus we only reported 'generalist ants'. Quantitative studies in Fiji (Guillaume Chomicki), Papua New Guinea (Milan Janda), Vanuatu (Bouchet et al., 2011) and Borneo (Kaufmann, 2002) revealed that generalists Hydnophytinae can have over 10 generalist ant species as inhabitants. The important mutualistic traits given here typically show patterns of association with mutualistic strategy, but none are confounding (i.e. there are exceptions). The few nomina nuda provided next to certain specimens in this study, and the 22 Hydnophytum species in this table are from an ongoing revision available from M. Jebb (Herbarium, National Botanic Gardens, Dublin, Ireland); when available, we further provide the link to the distributed herbarium material via barcodes.

| Species                                                           | Origin                                                      | Sampled in tree | Maximal entrance hole size (mm) | Post-anthetic sugar rewards | Dispersal mode | Warts   | Tuber growth | Tuber inhabitants                                    | Mutualism strategy | References                           |
|-------------------------------------------------------------------|-------------------------------------------------------------|-----------------|---------------------------------|-----------------------------|----------------|---------|--------------|------------------------------------------------------|--------------------|--------------------------------------|
| <i>Anthorrhiza aeralata</i> Huxley & Jebb                         | Papua New Guinea, Normanby island                           | Yes             | 30                              | Absent                      | Birds          | Present | Diffuse      | Cockroaches, occasionally gecko                      | Non-mutualist      | Jebb (1985); Huxley and Jebb (1991a) |
| <i>Anthorrhiza bracteosa</i> Huxley & Jebb                        | Papua New Guinea, D'Entrecasteaux archipelago               | Yes             | 5                               | Absent                      | Birds          | Present | Diffuse      | Cockroaches, beetles, a range of invertebrates       | Non-mutualist      | Jebb (1985); Huxley and Jebb (1991a) |
| <i>Anthorrhiza caerulea</i> Huxley & Jebb                         | Papua New Guinea, Morobe Province                           | Yes             | 20                              | Present                     | Ants           | Present | Apical       | Plant-ants ( <i>Anonychomyrma scrutator</i> complex) | Specialist         | Jebb (1985); Huxley and Jebb (1991a) |
| <i>Anthorrhiza camilla</i> Jebb                                   | Papua New Guinea, Morobe Province                           | No              | 2                               | Absent                      | Birds          | Present | Apical       | Plant-ants ( <i>Anonychomyrma scrutator</i> complex) | Specialist         | Jebb (1993)                          |
| <i>Anthorrhiza chrysacantha</i> Huxley & Jebb                     | Papua New Guinea, Central and Morobe provinces              | Yes             | 10                              | Present                     | Ants           | Present | Apical       | Plant-ants ( <i>Anonychomyrma scrutator</i> complex) | Specialist         | Jebb (1985); Huxley and Jebb (1991a) |
| <i>Anthorrhiza echinella</i> Huxley & Jebb                        | Papua New Guinea, Morobe Province                           | Yes             | 5                               | Absent                      | Birds          | Present | Diffuse      | Generalist ants                                      | Generalist         | Jebb (1985); Huxley and Jebb (1991a) |
| <i>Anthorrhiza mitis</i> Huxley & Jebb                            | Papua New Guinea, Central and Milne Bay Province            | No              | 10                              | Absent                      | Birds          | Present | Diffuse      | Generalist ants                                      | Generalist         | Jebb (1985); Huxley and Jebb (1991a) |
| <i>Anthorrhiza recurvispina</i> Huxley & Jebb                     | Papua New Guinea, Louisiade archipelago, Milne Bay Province | No              | 4                               | Absent                      | Birds          | Present | Diffuse      | Generalist ants, also <i>Phildiris cordata</i>       | Generalist         | Jebb (1985); Huxley and Jebb (1991a) |
| <i>Anthorrhiza stevensii</i> Huxley & Jebb                        | Papua New Guinea, Milne Bay Province                        | No              | Unknown                         | Absent                      | Birds          | Present | Diffuse      | Generalist ants and <i>Anonychomyrma sp.</i>         | Generalist         | Huxley and Jebb (1991a)              |
| <i>Hydnophytum acuminicalyx</i> Jebb & C. R. Huxley [nomen nudum] | Papua New Guinea, Eastern Highlands Province                | Yes             | 20                              | Absent                      | Birds          | Present | Diffuse      | Generalist ants, including <i>Anonychomyrma spp.</i> | Generalist         | Jebb (1985); Chomiccki (2016)        |
| <i>Hydnophytum albertisii</i> Becc.                               | Papua New Guinea, Western province                          | No              | 10                              | Absent                      | Birds          | Absent  | Diffuse      | Generalist ants                                      | Generalist         | Jebb (1985); Chomiccki (2016)        |
| <i>Hydnophytum alboviride</i> Merr. & L. M. Perry                 | Indonesian New Guinea                                       | Yes             | 30                              | Absent                      | Birds          | Absent  | Diffuse      | -                                                    | Non-mutualist      | Jebb (1985); Chomiccki (2016)        |
| <i>Hydnophytum archboldianum</i> Merr. & L. M. Perry              | Indonesian New Guinea                                       | Yes             | 10                              | Absent                      | Birds          | Absent  | Diffuse      | -                                                    | Non-mutualist      | Jebb (1985); Chomiccki (2016)        |
| <i>Hydnophytum bracteatum</i> Valetton                            | Indonesian New Guinea, Papua New Guinea                     | Yes             | 10                              | Absent                      | Birds          | Absent  | Diffuse      | -                                                    | Non-mutualist      | Jebb (1985); Chomiccki (2016)        |

|                                                                                                                                                                                                                                           |                                                                |     |         |         |                |         |         |                                                                                                                                                                |               |                                                               |
|-------------------------------------------------------------------------------------------------------------------------------------------------------------------------------------------------------------------------------------------|----------------------------------------------------------------|-----|---------|---------|----------------|---------|---------|----------------------------------------------------------------------------------------------------------------------------------------------------------------|---------------|---------------------------------------------------------------|
| <i>Hydnophytum buscifolium</i> Merr. & L. M. Perry                                                                                                                                                                                        | Indonesian New Guinea                                          | No  | 10      | Absent  | Birds          | Absent  | Diffuse | -                                                                                                                                                              | Non-mutualist | Jebb (1985); Chomiccki (2016)                                 |
| <i>Hydnophytum caminiferum</i> Wistuba, U.Zimm., Gronem. & Marwinski                                                                                                                                                                      | Indonesian New Guinea                                          | Yes | 30      | Absent  | Birds          | Absent  | Diffuse | Arthropods other than ants (in water)                                                                                                                          | Non-mutualist | Jebb (1985); Chomiccki (2016)                                 |
| <i>Hydnophytum confertifolium</i> Merr. & L. M. Perry                                                                                                                                                                                     | Indonesian New Guinea                                          | Yes | 10      | Absent  | Birds          | Absent  | Diffuse | -                                                                                                                                                              | Non-mutualist | Jebb (1985); Chomiccki (2016)                                 |
| <i>Hydnophytum contortum</i> Merr. & L. M. Perry                                                                                                                                                                                          | Papua New Guinea, Western, Central and Morobe provinces        | Yes | 10      | 10      | Birds          | Present | Diffuse | Generalist ants                                                                                                                                                | Generalist    | Jebb (1985); Chomiccki (2016)                                 |
| <i>Hydnophytum cordifolium</i> Valetton                                                                                                                                                                                                   | Papua New Guinea, Madang and Morobe provinces                  | No  | Unknown | Absent  | Birds          | Present | Diffuse | Generalist ants                                                                                                                                                | Generalist    | Jebb (1985); Chomiccki (2016)                                 |
| <i>Hydnophytum dauboense</i> Jebb & C. R. Huxley [nomen nudum] <a href="http://plants.jstor.org/stable/10.5555/alap.specimen.10843017">http://plants.jstor.org/stable/10.5555/alap.specimen.10843017</a>                                  | Papua New Guinea, Eastern Highlands Province                   | Yes | 50      | Absent  | Birds          | Absent  | Diffuse | A range of arthropods (excluding ants), including cockroaches, centipedes, spiders; frogs ( <i>Cophixaltus riparius</i> )                                      | Non-mutualist | Jebb (1985); Chomiccki (2016)                                 |
| <i>Hydnophytum davisii</i> Jebb & C. R. Huxley [nomen nudum] <a href="http://plants.jstor.org/stable/10.5555/alap.specimen.k000761943">http://plants.jstor.org/stable/10.5555/alap.specimen.k000761943</a>                                | Indonesian New Guinea                                          | No  | 13      | Absent  | Birds          | Present | Diffuse | -                                                                                                                                                              | Non-mutualist | Jebb (1985); Chomiccki (2016)                                 |
| <i>Hydnophytum decipiens</i> Merr. & L. M. Perry                                                                                                                                                                                          | Indonesian New Guinea                                          | No  | Unknown | Absent  | Birds          | Present | Diffuse | -                                                                                                                                                              | Non-mutualist | Jebb (1985); Chomiccki (2016)                                 |
| <i>Hydnophytum dentrecastense</i> Jebb & C. R. Huxley [nomen nudum] <a href="https://www.idigbio.org/portal/records/fb9f00f5-657d-4d88-9db6-96735563bd26">https://www.idigbio.org/portal/records/fb9f00f5-657d-4d88-9db6-96735563bd26</a> | Papua New Guinea, Normanby island                              | Yes | 10      | Absent  | Birds          | Present | Diffuse | -                                                                                                                                                              | Non-mutualist | Jebb (1985); Chomiccki (2016)                                 |
| <i>Hydnophytum ellipticum</i> Merr. & L. M. Perry                                                                                                                                                                                         | Indonesian New Guinea, Papua New Guinea                        | No  | 20      | Absent  | Birds          | Absent  | Diffuse | -                                                                                                                                                              | Non-mutualist | Jebb (1985); Chomiccki (2016)                                 |
| <i>Hydnophytum ferrugineum</i> P. I. Forst.                                                                                                                                                                                               | Australia, North Queensland                                    | No  | 10      | Absent  | Birds          | Present | Diffuse | Generalist ants                                                                                                                                                | Generalist    | Jebb (1985); Chomiccki (2016)                                 |
| <i>Hydnophytum formicarum</i> Jack                                                                                                                                                                                                        | Indonesia, New Guinea, Borneo, Thailand, Cambodia, Philippines | Yes | 10      | Present | Ants and birds | Present | Diffuse | Generalist ants including <i>Camponotus</i> spp., <i>Crematogaster difformis</i> , <i>C. spp.</i> , <i>Pheidole</i> sp. and plant-ant <i>Pholidris cordata</i> | Generalist    | Huxley (1982); Jebb (1985); Kaufmann (2002); Chomiccki (2016) |

|                                                                                                                                                                                                                           |                                                         |     |         |        |       |        |       |        |         |                                                                                                                           |               |                              |
|---------------------------------------------------------------------------------------------------------------------------------------------------------------------------------------------------------------------------|---------------------------------------------------------|-----|---------|--------|-------|--------|-------|--------|---------|---------------------------------------------------------------------------------------------------------------------------|---------------|------------------------------|
| <i>Hydnophytum fusiforme</i> Jebb & C. R. Huxley                                                                                                                                                                          | Papua New Guinea, Southern Highlands Province           | Yes | 20      | Absent | Birds | Absent | Birds | Absent | Diffuse | -                                                                                                                         | Non-mutualist | Jebb (1985); Chomicki (2016) |
| <i>Hydnophytum grandifolium</i> Valeton                                                                                                                                                                                   | Indonesian New Guinea                                   | No  | Unknown | Absent | Birds | Absent | Birds | Absent | Diffuse | Generalist ants                                                                                                           | Generalist    | Jebb (1985); Chomicki (2016) |
| <i>Hydnophytum haitians</i> Jebb & C. R. Huxley [nomen nudum]<br><a href="http://plants.jstor.org/stable/10.5555/5/al.ap.specimen.k000761971">http://plants.jstor.org/stable/10.5555/5/al.ap.specimen.k000761971</a>      | Papua New Guinea, Western Highlands province            | Yes | 20      | Absent | Birds | Absent | Birds | Absent | Diffuse | -                                                                                                                         | Non-mutualist | Jebb (1985); Chomicki (2016) |
| <i>Hydnophytum hellwigii</i> Warb.                                                                                                                                                                                        | Papua New Guinea incl. New Ireland, Solomon islands     | Yes | 6       | Absent | Birds | Absent | Birds | Absent | Diffuse | Generalist ants                                                                                                           | Generalist    | Jebb (1985); Chomicki (2016) |
| <i>Hydnophytum heterophyllum</i> Merr. & L. M. Perry                                                                                                                                                                      | Indonesian Papua New Guinea                             | No  | Unknown | Absent | Birds | Absent | Birds | Absent | Diffuse | Generalist ants                                                                                                           | Generalist    | Jebb (1985); Chomicki (2016) |
| <i>Hydnophytum kebarensense</i> Jebb & C. R. Huxley [nomen nudum]                                                                                                                                                         | Indonesian New Guinea                                   | No  | 10      | Absent | Birds | Absent | Birds | Absent | Diffuse | Generalist ants                                                                                                           | Generalist    | Jebb (1985); Chomicki (2016) |
| <i>Hydnophytum lauterbachii</i> Valeton                                                                                                                                                                                   | Indonesian New Guinea, Papua New Guinea                 | No  | 10      | Absent | Birds | Absent | Birds | Absent | Diffuse | Generalist ants                                                                                                           | Generalist    | Jebb (1985); Chomicki (2016) |
| <i>Hydnophytum linearifolium</i> Valeton                                                                                                                                                                                  | Papua New Guinea, Sepik province                        | No  | Unknown | Absent | Birds | Absent | Birds | Absent | Diffuse | Generalist ants                                                                                                           | Generalist    | Jebb (1985); Chomicki (2016) |
| <i>Hydnophytum lucidatum</i> Valeton                                                                                                                                                                                      | Papua New Guinea, Morobe and Central provinces          | No  | Unknown | Absent | Birds | Absent | Birds | Absent | Diffuse | Generalist ants                                                                                                           | Generalist    | Jebb (1985); Chomicki (2016) |
| <i>Hydnophytum magnifolium</i> Merr. & L. M. Perry                                                                                                                                                                        | Indonesian New Guinea, Papua New Guinea                 | No  | 6       | Absent | Birds | Absent | Birds | Absent | Diffuse | Generalist ants                                                                                                           | Generalist    | Jebb (1985); Chomicki (2016) |
| <i>Hydnophytum magnirabrum</i> Jebb & C. R. Huxley [nomen nudum]                                                                                                                                                          | Papua New Guinea, Enga and Southern Highlands provinces | Yes | 40      | Absent | Birds | Absent | Birds | Absent | Diffuse | Spiders, myriapods, orthopterans, dipteran larvae, planarians, anelids, cockroaches, centipedes, molluscs and crustaceans | Non-mutualist | Jebb (1985); Chomicki (2016) |
| <i>Hydnophytum mamberamoense</i> Jebb & C. R. Huxley [nomen nudum]<br><a href="http://plants.jstor.org/stable/10.5555/5/al.ap.specimen.k000761965">http://plants.jstor.org/stable/10.5555/5/al.ap.specimen.k000761965</a> | Indonesian Papua New Guinea                             | No  | 6       | Absent | Birds | Absent | Birds | Absent | Diffuse | -                                                                                                                         | Non-mutualist | Jebb (1985); Chomicki (2016) |
| <i>Hydnophytum mayuense</i> Jebb & C. R. Huxley [nomen nudum]                                                                                                                                                             | Papua New Guinea, Milne Bay province                    | No  | Unknown | Absent | Birds | Absent | Birds | Absent | Diffuse | Generalist ants                                                                                                           | Generalist    | Jebb (1985); Chomicki (2016) |
| <i>Hydnophytum microphyllum</i> Becc.                                                                                                                                                                                     | Indonesian New Guinea                                   | Yes | 10      | Absent | Birds | Absent | Birds | Absent | Diffuse | Generalist ants                                                                                                           | Generalist    | Jebb (1985); Chomicki (2016) |

|                                                                                                                                                                                                                                             |                                                                      |     |         |         |                |         |                |         |         |                                                                                                                                                                                                                                                                                                                                                 |               |                              |
|---------------------------------------------------------------------------------------------------------------------------------------------------------------------------------------------------------------------------------------------|----------------------------------------------------------------------|-----|---------|---------|----------------|---------|----------------|---------|---------|-------------------------------------------------------------------------------------------------------------------------------------------------------------------------------------------------------------------------------------------------------------------------------------------------------------------------------------------------|---------------|------------------------------|
| <i>Hydnophyllum minirubrum</i> Jebb & C. R. Huxley [nomen nudum]                                                                                                                                                                            | Papua New Guinea, Western Highlands and Southern Highlands provinces | Yes | 20      | Absent  | Birds          | Absent  | Birds          | Absent  | Diffuse | Spiders, myriapods, orthopterans, dipteran larvae, planarians, anelids, cockroaches, centipedes, molluscs and crustaceans                                                                                                                                                                                                                       | Non-mutualist | Jebb (1985); Chomicki (2016) |
| <i>Hydnophyllum montis-kani</i> Valetton                                                                                                                                                                                                    | Papua New Guinea                                                     | Yes | 10      | Absent  | Birds          | Absent  | Birds          | Present | Diffuse | Generalist ants                                                                                                                                                                                                                                                                                                                                 | Generalist    | Jebb (1985); Chomicki (2016) |
| <i>Hydnophyllum morotaiense</i> Jebb & C. R. Huxley [nomen nudum] ( <a href="http://plants.jstor.org/stable/10.5555/al.ap.specimen.a00071986">http://plants.jstor.org/stable/10.5555/al.ap.specimen.a00071986</a> )                         | Moluccas, Morotai island                                             | No  | Unknown | Absent  | Birds          | Absent  | Birds          | Present | Diffuse | Generalist ants                                                                                                                                                                                                                                                                                                                                 | Generalist    | Jebb (1985); Chomicki (2016) |
| <i>Hydnophyllum moseleyanum</i> Becc.                                                                                                                                                                                                       | Philippines, Solomon islands, Indonesia New Guinea, Papua New Guinea | Yes | 10      | Present | Ants and birds | Present | Ants and birds | Present | Diffuse | Generalist ants including <i>Tapinoma</i> sp., <i>Camponotus</i> sp., <i>Anoplolepis gracilipes</i> , <i>Opisthopsis maurus</i> , <i>Opisthopsis</i> sp., <i>Paratrechina</i> sp., <i>Colobopsis</i> sp., <i>Crematogaster</i> sp., <i>Monomorium</i> sp., <i>Tetraponera</i> sp. and plant-ant <i>Phildris cordata</i> and <i>Phildris</i> sp. | Generalist    | Jebb (1985); Chomicki (2016) |
| <i>Hydnophyllum multuberosum</i> Jebb & C. R. Huxley                                                                                                                                                                                        | Indonesian New Guinea, Waigeo island                                 | Yes | 5       | Absent  | Birds          | Absent  | Birds          | Present | Diffuse | Generalist ants                                                                                                                                                                                                                                                                                                                                 | Generalist    | Jebb (1985); Chomicki (2016) |
| <i>Hydnophyllum myrifolium</i> Merr. & L. M.                                                                                                                                                                                                | Papua New Guinea, Morobe, Central and Northern provinces             | No  | 80      | Absent  | Birds          | Absent  | Birds          | Absent  | Diffuse | Cockroaches, myriapods and frogs ( <i>Cophixalus riparius</i> )                                                                                                                                                                                                                                                                                 | Non-mutualist | Jebb (1985); Chomicki (2016) |
| <i>Hydnophyllum orichalcum</i> Jebb & C. R. Huxley [nomen nudum] ( <a href="http://plants.jstor.org/stable/10.5555/al.ap.specimen.k000761957">http://plants.jstor.org/stable/10.5555/al.ap.specimen.k000761957</a> )                        | Papua New Guinea, Louisiade archipelago                              | No  | Unknown | Absent  | Birds          | Absent  | Birds          | Present | Diffuse | Generalist ants                                                                                                                                                                                                                                                                                                                                 | Generalist    | Jebb (1985); Chomicki (2016) |
| <i>Hydnophyllum ovatum</i> Miq.                                                                                                                                                                                                             | Moluccas, Ternate island                                             | No  | 15      | Absent  | Birds          | Absent  | Birds          | Present | Diffuse | Generalist ants                                                                                                                                                                                                                                                                                                                                 | Generalist    | Jebb (1985); Chomicki (2016) |
| <i>Hydnophyllum pauper</i> Valetton ex Jebb & C. R. Huxley [nomen nudum]                                                                                                                                                                    | Indonesian New Guinea                                                | No  | 8       | Absent  | Birds          | Absent  | Birds          | Absent  | Diffuse | Frogs and <i>Peripatus</i> worms                                                                                                                                                                                                                                                                                                                | Non-mutualist | Jebb (1985); Chomicki (2016) |
| <i>Hydnophyllum petiolatum</i> Becc var. <i>argentatum</i> Jebb & C.R. Huxley [nomen nudum] ( <a href="http://plants.jstor.org/stable/10.5555/al.ap.specimen.10843016">http://plants.jstor.org/stable/10.5555/al.ap.specimen.10843016</a> ) | Papua New Guinea, Normanby island                                    | Yes | 25      | Absent  | Birds          | Absent  | Birds          | Present | Diffuse | Cockroaches                                                                                                                                                                                                                                                                                                                                     | Non-mutualist | Jebb (1985); Chomicki (2016) |
| <i>Hydnophyllum petiolatum</i> Becc var. <i>auridemens</i> Jebb & C.R. Huxley [nomen nudum]                                                                                                                                                 | Papua New Guinea, Missima island                                     | Yes | 9       | Absent  | Birds          | Absent  | Birds          | Present | Diffuse | Generalist ants                                                                                                                                                                                                                                                                                                                                 | Generalist    | Jebb (1985); Chomicki (2016) |

|                                                                                                                                                                                                                                 |                                                     |     |    |        |       |         |         |                                                                                |               |                               |
|---------------------------------------------------------------------------------------------------------------------------------------------------------------------------------------------------------------------------------|-----------------------------------------------------|-----|----|--------|-------|---------|---------|--------------------------------------------------------------------------------|---------------|-------------------------------|
| <a href="http://plants.jstor.org/stable/10.5555/al.ap.specimen.k000761977">http://plants.jstor.org/stable/10.5555/al.ap.specimen.k000761977</a><br><i>Hydnophytum puffii</i> Low, Sugau & Wong                                  | Borneo                                              | Yes | 10 | Absent | Birds | Present | Diffuse | Generalist ants including <i>Camponotus spp.</i> and <i>Crematogaster spp.</i> | Generalist    | Jebb (1985); Chomiccki (2016) |
| <i>Hydnophytum punamense</i> Lauterb.                                                                                                                                                                                           | Papua New Guinea                                    | Yes | 6  | Absent | Birds | Present | Diffuse | Generalist ants                                                                | Generalist    | Jebb (1985); Chomiccki (2016) |
| <i>Hydnophytum radicans</i> Becc.                                                                                                                                                                                               | Moluccas, Indonesian New Guinea, Papua New Guinea   | Yes | 10 | Absent | Birds | Present | Diffuse | Generalist ants                                                                | Generalist    | Jebb (1985); Chomiccki (2016) |
| <i>Hydnophytum ramispinum</i> Merr. & L. M. Perry                                                                                                                                                                               | Indonesian New Guinea                               | Yes | 20 | Absent | Birds | Absent  | Diffuse | Generalist ants                                                                | Generalist    | Jebb (1985); Chomiccki (2016) |
| <i>Hydnophytum reevii</i> Jebb & C. R. Huxley [nomen nudum]                                                                                                                                                                     | Papua New Guinea, Enga province                     | No  | 6  | Absent | Birds | Absent  | Diffuse | -                                                                              | Non-mutualist | Jebb (1985); Chomiccki (2016) |
| <i>Hydnophytum simplex</i> Becc.                                                                                                                                                                                                | Papua New Guinea                                    | Yes | 10 | Absent | Birds | Present | Diffuse | Generalist ants                                                                | Generalist    | Jebb (1985); Chomiccki (2016) |
| <i>Hydnophytum spathulatum</i> Valetton                                                                                                                                                                                         | Moluccas                                            | No  | 15 | Absent | Birds | Present | Diffuse | Generalist ants                                                                | Generalist    | Jebb (1985); Chomiccki (2016) |
| <i>Hydnophytum terrestris</i> Jebb & C. R. Huxley [nomen nudum]                                                                                                                                                                 | Papua New Guinea, Eastern Highlands province        | Yes | 10 | Absent | Birds | Present | Diffuse | Generalist ants, including <i>Vollethovia</i> sp.                              | Generalist    | Jebb (1985); Chomiccki (2016) |
| <i>Hydnophytum tetrapterum</i> Becc.                                                                                                                                                                                            | Indonesian New Guinea, West Papua and Waigeo island | Yes | 10 | Absent | Birds | Present | Diffuse | Generalist ants                                                                | Generalist    | Jebb (1985); Chomiccki (2016) |
| <i>Hydnophytum tortuosum</i> Becc.                                                                                                                                                                                              | Indonesian New Guinea, West Papua                   | Yes | 10 | Absent | Birds | Present | Diffuse | Generalist ants, including <i>Anoplolepis gracilipes</i>                       | Generalist    | Jebb (1985); Chomiccki (2016) |
| <i>Hydnophytum trichomanes</i> Jebb & C. R. Huxley [nomen nudum]<br><a href="http://plants.jstor.org/stable/history/10.5555/al.ap.specimen.a0009675">http://plants.jstor.org/stable/history/10.5555/al.ap.specimen.a0009675</a> | Indonesian New Guinea, including Japen island       | Yes | 10 | Absent | Birds | Absent  | Diffuse | Cockroaches                                                                    | Non-mutualist | Jebb (1985); Chomiccki (2016) |
| <i>Hydnophytum vacciniifolium</i> P. Royen                                                                                                                                                                                      | Indonesian New Guinea                               | Yes | 30 | Absent | Birds | Absent  | Diffuse | -                                                                              | Non-mutualist | Jebb (1985); Chomiccki (2016) |
| <i>Hydnophytum valettonii</i> Jebb & C. R. Huxley [nomen nudum]                                                                                                                                                                 | Indonesian New Guinea                               | No  | 10 | Absent | Birds | Absent  | Diffuse | Spiders                                                                        | Non-mutualist | Jebb (1985); Chomiccki (2016) |
| <i>Hydnophytum vitis-idaea</i> Merr. & L.                                                                                                                                                                                       | Indonesian New Guinea                               | Yes | 6  | Absent | Birds | Absent  | Diffuse | -                                                                              | Non-mutualist | Jebb (1985); Chomiccki (2016) |



| M. Perry                                                                    | Yes | 4       | Present | Ants and birds | Present | Ants and birds | Present | Apical | Plant-ants ( <i>Phildiris cordatus</i> and <i>Anonychomyrma scrutator</i> complex) | mutualist  | Chomicki (2016)                     |
|-----------------------------------------------------------------------------|-----|---------|---------|----------------|---------|----------------|---------|--------|------------------------------------------------------------------------------------|------------|-------------------------------------|
| <i>Myrmecodia alata</i> Becc.                                               | Yes | 4       | Present | Ants and birds | Present | Ants and birds | Present | Apical | Plant-ants ( <i>Phildiris cordatus</i> and <i>Anonychomyrma scrutator</i> complex) | Specialist | Jebb (1985); Huxley and Jebb (1993) |
| <i>Myrmecodia albertisii</i> Becc. subsp. <i>incompta</i> Huxley & Jebb     | No  | 4       | Present | Ants and birds | Present | Ants and birds | Present | Apical | Plant-ants ( <i>Phildiris cordatus</i> and <i>Anonychomyrma scrutator</i> complex) | Specialist | Jebb (1985); Huxley and Jebb (1993) |
| <i>Myrmecodia albertisii</i> subsp. <i>albertisii</i> (Becc.) Huxley & Jebb | No  | 4       | Present | Ants and birds | Present | Ants and birds | Present | Apical | Plant ants ( <i>Phildiris cordatus</i> )                                           | Specialist | Jebb (1985); Huxley and Jebb (1993) |
| <i>Myrmecodia albertisii</i> subsp. <i>valida</i> (Becc.) Huxley & Jebb     | Yes | 4       | Present | Ants and birds | Present | Ants and birds | Present | Apical | Plant-ants ( <i>Phildiris cordatus</i> and <i>Anonychomyrma scrutator</i> complex) | Specialist | Jebb (1985)                         |
| <i>Myrmecodia angustifolia</i> Valeton                                      | No  | 8       | Present | Ants and birds | Present | Ants and birds | Present | Apical | Plant-ants ( <i>Anonychomyrma scrutator</i> complex)                               | Specialist | Jebb (1985); Huxley and Jebb (1993) |
| <i>Myrmecodia archboldiana</i> Merr. & Perry                                | No  | Unknown | Present | Ants and birds | Present | Ants and birds | Present | Apical | Plant-ants ( <i>Anonychomyrma scrutator</i> complex)                               | Specialist | Jebb (1985); Huxley and Jebb (1993) |
| <i>Myrmecodia aureospina</i> Huxley & Jebb                                  | Yes | 4       | Present | Ants and birds | Present | Ants and birds | Present | Apical | Plant-ants ( <i>Phildiris cordatus</i> and <i>Anonychomyrma scrutator</i> complex) | Specialist | Jebb (1985); Huxley and Jebb (1993) |
| <i>Myrmecodia beccarii</i> J.D. Hooker                                      | Yes | 8       | Present | Ants and birds | Present | Ants and birds | Present | Apical | Plant ants ( <i>Phildiris cordata</i> )                                            | Specialist | Jebb (1985); Huxley and Jebb (1993) |
| <i>Myrmecodia brassii</i> Merr. & Perry                                     | Yes | 6       | Present | Ants and birds | Present | Ants and birds | Present | Apical | Plant-ants ( <i>Anonychomyrma scrutator</i> complex)                               | Specialist | Jebb (1985); Huxley and Jebb (1993) |
| <i>Myrmecodia dahlii</i> K.Schum.                                           | Yes | 7       | Present | Ants and birds | Present | Ants and birds | Present | Apical | Plant-ants ( <i>Phildiris myrmecodidae</i> )                                       | Specialist | Jebb (1985); Huxley and Jebb (1993) |
| <i>Myrmecodia erinacea</i> Becc.                                            | No  | 8       | Present | Ants and birds | Present | Ants and birds | Present | Apical | Plant-ants ( <i>Phildiris cordatus</i> and <i>Anonychomyrma scrutator</i> complex) | Specialist | Jebb (1985); Huxley and Jebb (1993) |
| <i>Myrmecodia ferox</i> Huxley & Jebb                                       | Yes | 8       | Present | Ants and birds | Present | Ants and birds | Present | Apical | Plant-ants ( <i>Anonychomyrma scrutator</i> complex)                               | Specialist | Jebb (1985); Huxley and Jebb (1993) |
| <i>Myrmecodia gracilis</i> Huxley & Jebb                                    | Yes | 8       | Present | Ants and birds | Present | Ants and birds | Present | Apical | Plant-ants ( <i>Anonychomyrma scrutator</i> complex)                               | Specialist | Jebb (1985); Huxley and Jebb (1993) |
| <i>Myrmecodia horrida</i> Huxley & Jebb                                     | Yes | 8       | Present | Ants and birds | Present | Ants and birds | Present | Apical | Plant-ants ( <i>Anonychomyrma scrutator</i> complex)                               | Specialist | Jebb (1985); Huxley and Jebb (1993) |

|                                                                                 |                                                      |     |   |         |                |         |        |                                                                                    |            |                                     |
|---------------------------------------------------------------------------------|------------------------------------------------------|-----|---|---------|----------------|---------|--------|------------------------------------------------------------------------------------|------------|-------------------------------------|
| <i>Myrmecodia jobiensis</i> Becc.                                               | Indonesian New Guinea                                | Yes | 6 | Present | Ants and birds | Present | Apical | Plant-ants ( <i>Anonychomyrma scrutator</i> complex)                               | Specialist | Jebb (1985); Huxley and Jebb (1993) |
| <i>Myrmecodia kutubuensis</i> Huxley & Jebb                                     | Papua New Guinea, southern highlands                 | No  | 7 | Present | Ants and birds | Present | Apical | Plant ants ( <i>Philitris cordata</i> )                                            | Specialist | Jebb (1985); Huxley and Jebb (1993) |
| <i>Myrmecodia lamii</i> Merr. & Perry                                           | Indonesian New Guinea                                | Yes | 8 | Present | Ants and birds | Present | Apical | Plant-ants ( <i>Anonychomyrma scrutator</i> complex)                               | Specialist | Jebb (1985); Huxley and Jebb (1993) |
| <i>Myrmecodia longifolia</i> Valetton                                           | Indonesian New Guinea Papua New Guinea               | Yes | 6 | Present | Ants and birds | Present | Apical | Plant-ants ( <i>Philitris cordatus</i> and <i>Anonychomyrma scrutator</i> complex) | Specialist | Jebb (1985); Huxley and Jebb (1993) |
| <i>Myrmecodia longissima</i> Valetton                                           | Indonesian New Guinea, Papua New Guinea              | No  | 8 | Present | Ants and birds | Present | Apical | Plant ants ( <i>Philitris cordata</i> )                                            | Specialist | Jebb (1985); Huxley and Jebb (1993) |
| <i>Myrmecodia melanacantha</i> Huxley & Jebb                                    | Papua New Guinea                                     | Yes | 5 | Present | Ants and birds | Present | Apical | Plant-ants ( <i>Anonychomyrma scrutator</i> complex)                               | Specialist | Jebb (1985); Huxley and Jebb (1993) |
| <i>Myrmecodia oblongata</i> Valetton                                            | Papua New Guinea                                     | No  | 6 | Present | Ants and birds | Present | Apical | Plant-ants ( <i>Anonychomyrma scrutator</i> complex)                               | Specialist | Jebb (1985); Huxley and Jebb (1993) |
| <i>Myrmecodia oksapminensis</i> Huxley & Jebb                                   | Papua New Guinea                                     | No  | 8 | Present | Ants and birds | Present | Apical | Plant-ants ( <i>Anonychomyrma scrutator</i> complex)                               | Specialist | Jebb (1985); Huxley and Jebb (1993) |
| <i>Myrmecodia paradoxa</i> Huxley & Jebb                                        | Papua New Guinea                                     | No  | 7 | Present | Ants and birds | Present | Apical | Plant-ants ( <i>Anonychomyrma scrutator</i> complex)                               | Specialist | Jebb (1985); Huxley and Jebb (1993) |
| <i>Myrmecodia pendens</i> Merr. & perry                                         | Papua New Guinea                                     | Yes | 5 | Present | Ants and birds | Present | Apical | Plant-ants ( <i>Philitris cordatus</i> and <i>Anonychomyrma scrutator</i> complex) | Specialist | Jebb (1985); Huxley and Jebb (1993) |
| <i>Myrmecodia platyptera</i> subsp. <i>antoinii</i> (Becc.) C.R.Huxley & Jebb   | Papua New Guinea, Australia (North Queensland)       | Yes | 6 | Present | Ants and birds | Present | Apical | Plant ants ( <i>Philitris cordata</i> )                                            | Specialist | Jebb (1985); Huxley and Jebb (1993) |
| <i>Myrmecodia platyptera</i> subsp. <i>platyptera</i> (Becc.) C.R.Huxley & Jebb | Moluccas, Indonesian New Guinea, Papua New Guinea    | Yes | 6 | Present | Ants and birds | Present | Apical | Plant-ants ( <i>Anonychomyrma scrutator</i> complex)                               | Specialist | Jebb (1985); Huxley and Jebb (1993) |
| <i>Myrmecodia pterospida</i> Huxley & Jebb                                      | Papua New Guinea                                     | Yes | 6 | Present | Ants and birds | Present | Apical | Plant-ants ( <i>Anonychomyrma scrutator</i> complex)                               | Specialist | Jebb (1985); Huxley and Jebb (1993) |
| <i>Myrmecodia rumphii</i> Becc                                                  | Moluccas, Eastern Indonesia, Lesser Sunda islands    | Yes | 7 | Present | Ants and birds | Present | Apical | Plant-ants ( <i>Philitris</i> sp.)                                                 | Specialist | Jebb (1985); Huxley and Jebb (1993) |
| <i>Myrmecodia salomonensis</i> Becc.                                            | Papua New Guinea, New Ireland, Bougainville, Solomon | Yes | 5 | Present | Ants and birds | Present | Apical | Plant-ants ( <i>Philitris cordata</i> and <i>P. myrmecodiae</i> )                  | Specialist | Jebb (1985); Huxley and Jebb (1993) |

|                                                                                                               |                                                           |     |    |         |  |                |         |         |                                                                                    |            |                                         |
|---------------------------------------------------------------------------------------------------------------|-----------------------------------------------------------|-----|----|---------|--|----------------|---------|---------|------------------------------------------------------------------------------------|------------|-----------------------------------------|
| <i>Mymecodia schlechteri</i> subsp. <i>eraveensis</i> (Valeton) Huxley & Jebb                                 | islands<br>Papua New Guinea, Southern Highlands           | No  | 7  | Present |  | Ants and birds | Present | Apical  | Plant-ants ( <i>Anonychomyrma scrutator</i> complex)                               | Specialist | Jebb (1993); Huxley and Jebb (1993)     |
| <i>Mymecodia schlechteri</i> subsp. <i>kopiagoensis</i> (Valeton) Huxley & Jebb                               | Papua New Guinea, Western Highlands Province              | No  | 7  | Present |  | Ants and birds | Present | Apical  | Plant-ants ( <i>Philidris cordatus</i> )                                           | Specialist | Jebb (1985); Huxley and Jebb (1993)     |
| <i>Mymecodia schlechteri</i> subsp. <i>pendula</i> (Merr. & Perry) Huxley & Jebb                              | Papua New Guinea                                          | No  | 7  | Present |  | Ants and birds | Present | Apical  | Plant-ants ( <i>Anonychomyrma scrutator</i> complex)                               | Specialist | Jebb (1985); Huxley and Jebb (1993)     |
| <i>Mymecodia schlechteri</i> subsp. <i>schlechteri</i> var. <i>schlechteri</i> (Valeton) C.R.Huxley & Jebb    | Papua New Guinea                                          | Yes | 7  | Present |  | Ants and birds | Present | Apical  | Plant-ants ( <i>Philidris cordatus</i> and <i>Anonychomyrma scrutator</i> complex) | Specialist | Jebb (1985); Huxley and Jebb (1993)     |
| <i>Mymecodia schlechteri</i> Valeton subsp. <i>schlechteri</i> var. <i>longispina</i> (Valeton) Huxley & Jebb | Papua New Guinea, Madang province                         | No  | 7  | Present |  | Ants and birds | Present | Apical  | Plant-ants ( <i>Anonychomyrma scrutator</i> complex)                               | Specialist | Jebb (1985); Huxley and Jebb (1993)     |
| <i>Mymecodia sterrophylla</i> Merr. & Perry                                                                   | Indonesian New Guinea Papua New Guinea                    | Yes | 8  | Present |  | Ants and birds | Present | Apical  | Plant-ants ( <i>Anonychomyrma scrutator</i> complex)                               | Specialist | Jebb (1985); Huxley and Jebb (1993)     |
| <i>Mymecodia tuberosa</i> Jack                                                                                | Indonesia, New Guinea, Borneo, Thailand                   | Yes | 8  | Present |  | Ants and birds | Present | Apical  | Plant-ants ( <i>Philidris cordata</i> and <i>P. myrmecodiae</i> )                  | Specialist | Jebb (1985); Huxley and Jebb (1993)     |
| <i>Mymephytum afakianum</i> (Becc.) Huxley & Jebb                                                             | Indonesian New Guinea, Western part                       | Yes | 10 | Unknown |  | Ants and birds |         | Apical  | Plant ants ( <i>Anonychomyrma scrutator</i> complex)                               | Specialist | Jebb (1985); Huxley and Jebb (1991b)    |
| <i>Mymephytum beccarii</i> Elmer                                                                              | Philippines (Northern)                                    | Yes | 10 | Absent  |  | Birds          |         | Diffuse | Generalist ants                                                                    | Generalist | Jebb (1985); Huxley and Jebb (1991b)    |
| <i>Mymephytum moniliforme</i> Huxley & Jebb                                                                   | Indonesian New Guinea, most western extreme of West Papua | No  | 10 | Absent  |  | Birds          |         | Diffuse | Generalist ants                                                                    | Generalist | Jebb (1985); Huxley and Jebb (1991b)    |
| <i>Mymephytum naumannii</i> (Warb.) Huxley & Jebb                                                             | Indonesian New Guinea, Western part                       | Yes | 10 | Absent  |  | Birds          |         | Diffuse | Generalist ants                                                                    | Generalist | Jebb (1985); Huxley and Jebb (1991b)    |
| <i>Mymephytum selebicum</i> (Becc.) Becc.                                                                     | Philippines (South) and Northern Sulawesi                 | Yes | 10 | Absent  |  | Birds          |         | Diffuse | Generalist ants                                                                    | Generalist | Jebb (1985); Huxley and Jebb (1991b)    |
| <i>Squamellaria grayi</i> Chomicki & Wistuba                                                                  | Fiji, Taveuni and Vanua Levu                              | Yes | 3  | Absent  |  | Ants           |         | Apical  | Specialist plant-ants ( <i>Philidris nagasau</i> )                                 | Specialist | Chomicki and Renner (2016)              |
| <i>Squamellaria guppyana</i> (Becc.) Chomicki                                                                 | Solomon islands                                           | Yes | 4  | Absent  |  | Birds          |         | Apical  | Generalist ants, including <i>Philidris</i> sp.                                    | Generalist | Jebb (1985); Chomicki and Renner (2016) |

|                                                                               |                  |     |    |         |       |         |         |                                                                                                                                                                                                                                                                                                                        |               |                                                    |
|-------------------------------------------------------------------------------|------------------|-----|----|---------|-------|---------|---------|------------------------------------------------------------------------------------------------------------------------------------------------------------------------------------------------------------------------------------------------------------------------------------------------------------------------|---------------|----------------------------------------------------|
| <i>Squamellaria huxleyana</i> Chomiccki                                       | Fiji, Vanua Levu | Yes | 3  | Present | Ants  | Present | Apical  | Specialist plant-ants ( <i>Philitidris nagasau</i> )                                                                                                                                                                                                                                                                   | Specialist    | Chomiccki and Renner (2016)                        |
| <i>Squamellaria imberbis</i> (A. Gray)                                        | Fiji, Vanua Levu | Yes | 3  | Present | Ants  | Present | Apical  | Specialist plant-ants ( <i>Philitidris nagasau</i> )                                                                                                                                                                                                                                                                   | Specialist    | Chomiccki and Renner (2016)                        |
| <i>Squamellaria jebbiana</i> Chomiccki                                        | Fiji, Taveuni    | Yes | 40 | Absent  | Birds | Present | Diffuse | Generalist ants ( <i>Pheidole knowlesi</i> , <i>Anoplolepis gracilipes</i> )                                                                                                                                                                                                                                           | Generalist    | Chomiccki and Renner (in revision)                 |
| <i>Squamellaria kajewskii</i> (Merr. & L.M.Perry) Chomiccki                   | Solomon islands  | Yes | 25 | Absent  | Birds | Present | Apical  | Cockroaches                                                                                                                                                                                                                                                                                                            | Non-mutualist | Chomiccki and Renner (2016)                        |
| <i>Squamellaria major</i> A.C. Sm.                                            | Fiji, Taveuni    | Yes | 3  | Present | Ants  | Present | Apical  | Specialist plant-ants ( <i>Philitidris nagasau</i> )                                                                                                                                                                                                                                                                   | Specialist    | Chomiccki and Renner (2016)                        |
| <i>Squamellaria tenuiflora</i> (Becc.) Chomiccki                              | Fiji, Viti Levu  | Yes | 50 | Absent  | Birds | Present | Diffuse | Generalist ants ( <i>Camponotus maafui</i> , <i>Lordomyrma desupra</i> , <i>Pheidole knowlesi</i> , <i>P. wilsoni</i> , <i>Poecilomyrma myrmecodidae</i> , <i>Tapinoma minutum</i> , <i>Technomyrmex vitiensis</i> )                                                                                                   | Generalist    | Sarnat (2009); Chomiccki and Renner (in revision); |
| <i>Squamellaria thekii</i> Jebb                                               | Fiji, Taveuni    | Yes | 3  | Present | Ants  | Present | Apical  | Specialist plant-ants ( <i>Philitidris nagasau</i> )                                                                                                                                                                                                                                                                   | Specialist    | Chomiccki and Renner (2016)                        |
| <i>Squamellaria vanuatuensis</i> Jebb & C.R.Huxley in Chomiccki & S.S. Renner | Vanuatu          | Yes | 4  | Absent  | Birds | Present | Diffuse | Generalist ants ( <i>Iridomyrmex</i> sp., <i>Tetramorium</i> sp., <i>Pheidole</i> sp., <i>Polyrhichis</i> sp., <i>Crematogaster</i> sp., <i>Amblyopone</i> sp., <i>Cerapachys</i> sp., <i>Paratrechina</i> sp., <i>Strumigenys</i> spp., <i>Turneria</i> sp.)                                                          | Generalist    | Bouchet et al. (2011); Chomiccki and Renner (2016) |
| <i>Squamellaria wilkinsonii</i> (Horne ex Baker) Chomiccki                    | Fiji, Vanua Levu | Yes | 50 | Absent  | Birds | Present | Diffuse | Generalist ants ( <i>Anoplolepis gracilipes</i> , <i>Camponotus maafui</i> , <i>Colobopsis polynesica</i> , <i>Ochetellus sorosis</i> , <i>Paraparatrechina oceanica</i> , <i>Pheidole knowlesi</i> , <i>Strumigenys nidifex</i> , <i>Technomyrmex vitiensis</i> , <i>Tetramorium insolens</i> , <i>T. pacificum</i> ) | Generalist    | Sarnat (2009); Chomiccki and Renner (in revision)  |
| <i>Squamellaria wilsonii</i> (Horne ex Baker) Becc.                           | Fiji, Taveuni    | Yes | 3  | Present | Ants  | Present | Apical  | Specialist plant-ants ( <i>Philitidris nagasau</i> )                                                                                                                                                                                                                                                                   | Specialist    | Chomiccki and Renner (2016)                        |

## References

- Bouchet P, Le Guyader H, Pascal O. (eds) (2011) *The Natural History of Santo*. Patrimoines Naturels.
- Chomicki G, Staedler Y, Schönenberger J, Renner SS (2016) Partner choice through concealed floral sugar rewards evolved with the specialization of ant/plant mutualisms. *New Phytol* 211:1358-1370.
- Chomicki G (2016) *Ant/plant symbioses: evolution, specialization and breakdown*. Doctoral thesis, Ludwig-Maximilians University, Munich.
- Chomicki G, Renner SS (2016) Evolutionary relationships and history of the ant-epiphytic genus *Squamellaria* (Rubiaceae: Psychotriaceae) and their taxonomic implications. *PLoS ONE* 11:e0151317.
- Chomicki G, Renner SS (2016) Obligate plant farming by a specialized ant. *Nature Plants* 2:16181.
- Jebb MHP (1985) *Taxonomy and tuber morphology of the Rubiaceae ant-plants*. D.Phil thesis, University of Oxford, UK.
- Jebb MHP (1993) *Anthorrhiza camilla*. *Blumea* 37:341-344.
- Huxley CR (1982) Ant-epiphytes of Australia. In R.P. Buckley (ed.) *Ant-plant interactions in Australia* (pp. 63-73). Springer Netherlands.
- Huxley CR, Jebb MHP (1991a) The tuberous epiphytes of the Rubiaceae 2: the new genus *Anthorrhiza*. *Blumea* 36:21-41.
- Huxley CR, Jebb MHP (1991b) The tuberous epiphytes of the Rubiaceae 3: a revision of *Myrmephytum* to include *Myrmedoma*. *Blumea* 36:43-52.
- Huxley CR, Jebb MHP (1993) The tuberous epiphytes of the Rubiaceae 5. A revision of *Myrmecodia*. *Blumea* 37:271-334.
- Huxley CR (1978) The ant-plants *Myrmecodia* and *Hydnophytum* (Rubiaceae), and the relationships between their morphology, ant occupants, physiology and ecology. *New Phytol* 80:231-268.
- Kaufmann E (2002) *Southeast Asian ant-gardens: Diversity, ecology, ecosystematic significance, and evolution of mutualistic ant-epiphyte associations*. PhD thesis J-W Goethe-Universität, Frankfurt am Main, Germany.
- Maeyama T., Kitade O., Matsumoto T. (1997). The diverse occupant fauna in epiphytic ant-plants, *Hydnophytum moseleyanum* (Rubiaceae) in New Guinea. *Tropics* 7:93-103.
- Sarnat EM (2009) *The ants [Hymenoptera: Formicidae] of Fiji: systematics, biogeography and conservation of an island arc fauna*. University of California, Davis.

**Table S2.** Hydnohytinae material included in this study, with taxonomic authors, vouchers and their geographic origin, and GenBank accession numbers for all sequences. Herbarium acronyms follow the *Index Herbariorum* (<http://sciweb.nybg.org/science2/IndexHerbariorum.asp>). Fourteen names are *nomina nuda* and given only here following Matthew Jebb ongoing *Hydnophytum* revision (Herbarium, National Botanic Gardens, Dublin, Ireland).

| Taxon                                                                                                                     | Voucher                            | Geographic origin                               | ITS      | ETS      | trnL intron | trnL-trnF spacer | ndhF     | trnH-psbA |
|---------------------------------------------------------------------------------------------------------------------------|------------------------------------|-------------------------------------------------|----------|----------|-------------|------------------|----------|-----------|
| <i>Amaracarpus muscifer</i> A.C.Sm.                                                                                       | L. Barrabé & M. Tuiwawa 1109 (NOU) | Fiji                                            | KF675907 | KF675790 | -           | -                | KF675995 | -         |
| <i>Amaracarpus nematopodus</i> (F.Muell.) P.I.Forst.                                                                      | L. Barrabé et al. 1030 (NOU)       | Australia                                       | JX155060 | KF675791 | -           | -                | JX155105 | -         |
| <i>Anthorrhiza areolata</i> Huxley & Jebb                                                                                 | M.P.H. Jebb 383 (FHO)              | Papua New Guinea, Normanby island               | -        | KX944417 | -           | -                | -        | KY002583  |
| <i>Anthorrhiza caerulea</i> Huxley & Jebb                                                                                 | M.P.H. Jebb 358 (FHO)              | Papua New Guinea                                | KU586349 | KU586368 | -           | -                | -        | KY002584  |
| <i>Anthorrhiza chrysacantha</i> Huxley & Jebb                                                                             | M.P.H. Jebb 175 (FHO)              | Papua New Guinea                                | -        | KX944418 | -           | -                | -        | KY002585  |
| <i>Anthorrhiza bracteosa</i> Huxley & Jebb                                                                                | M.P.H. Jebb 374 (FHO)              | Papua New Guinea, Normanby island               | -        | KX944419 | -           | -                | -        | KY002586  |
| <i>Anthorrhiza echinella</i>                                                                                              | G. Chomicki 83 (M)                 | Cultivated Oxf. Bot Gard., origin New Guinea    | KU586350 | KU586369 | -           | -                | -        | -         |
| <i>Hedstromia latifolia</i> A.C.Sm.                                                                                       | L. Barrabé et al 1090 (NOU)        | Fiji                                            | KF675911 | KF675795 | -           | -                | KF675999 | -         |
| <i>Hydnophytum formicarum</i> Jack                                                                                        | G. Chomicki 87 (M)                 | Cultivated, origin Malaysian region             | KU586346 | KU586365 | -           | -                | KU586397 | -         |
| <i>Hydnophytum formicarum</i> Jack                                                                                        | G. Chomicki 90 (M)                 | Cultivated, origin Sulawesi                     | KX944391 | KX944420 | KX944446    | KY002551         | KY002570 | KY002587  |
| <i>Hydnophytum simplex</i> Becc.                                                                                          | G. Chomicki 94 (M)                 | Cultivated, origin Aru Island, Papua New Guinea | KU963311 | KU963332 | KU963350    | KU963362         | KU963377 | KY002588  |
| <i>Hydnophytum montis-kani</i> Valetton                                                                                   | M.J. Sudo 1193 (L)                 | Papua New Guinea                                | KX944392 | -        | -           | -                | -        | KY002589  |
| <i>Hydnophytum</i> sp. 1 (= <i>H. dentrecastense</i> n. nud. in Jebb and C.R. Huxley ongoing <i>Hydnophytum</i> revision) | L.J. Brass 2568 2 (L)              | Papua New Guinea                                | KU963312 | -        | -           | -                | -        | KY002590  |
| <i>Hydnophytum</i> sp. 3 (= <i>H. terrestris</i> n. nud. in Jebb and C.R. Huxley ongoing <i>Hydnophytum</i> revision)     | M.P.H. Jebb 315 (FHO)              | Papua New Guinea                                | KU963314 | KX944421 | -           | KU963376         | -        | KY002592  |

|                                                                                                                                                    |                             |                                              |          |          |          |          |          |          |
|----------------------------------------------------------------------------------------------------------------------------------------------------|-----------------------------|----------------------------------------------|----------|----------|----------|----------|----------|----------|
| <i>Hydnophytum hellwigii</i> Warb.                                                                                                                 | R. Schlechter<br>13674 (BM) | Papua New<br>Guinea                          | KX944393 | KX944422 | -        | -        | -        | -        |
| <i>Hydnophytum radicans</i> Becc.                                                                                                                  | M.H.P. Jebb<br>427 (FHO)    | Papua New<br>Guinea                          | KX944394 | KX944423 | -        | KY002552 | KY002571 | KY002593 |
| <i>Hydnophytum punamense</i> Lauterb.                                                                                                              | L.J. Brass<br>15008 (BM)    | Papua New<br>Guinea                          | -        | KX944424 | -        | -        | -        | -        |
| <i>Hydnophytum vitis-idaea</i> Merr. & L.M.Perry                                                                                                   | L.J. Brass<br>12046 (BM)    | Papua New<br>Guinea                          | KU963316 | KU963337 | KU963351 | KU963363 | -        | KY002594 |
| <i>Hydnophytum</i> sp. ( <i>Hydnophytum petiolatum</i> var. <i>argentatum</i> n. nud. in Jebb and C.R. Huxley ongoing <i>Hydnophytum</i> revision) | M.H.P. Jebb<br>379 (FHO)    | Normanby<br>island, Papua<br>New Guinea      | -        | KX944425 | -        | KY002553 | -        | KY002595 |
| <i>Hydnophytum</i> sp. ( <i>Hydnophytum petiolatum</i> var. <i>auridemens</i> n. nud. in Jebb and C.R. Huxley ongoing <i>Hydnophytum</i> revision) | M.H.P. Jebb<br>398 (FHO)    | Missima<br>island, Papua<br>New Guinea       | -        | KX944426 | -        | KY002554 | -        | KY002596 |
| <i>Hydnophytum</i> sp. ( <i>Hydnophytum dauloense</i> n. nud. in Jebb and C.R. Huxley ongoing <i>Hydnophytum</i> revision)                         | M.H.P. Jebb<br>337 (FHO)    | Papua New<br>Guinea                          | KX944395 | KX944427 | KX944447 | KY002555 | KY002572 | KY002597 |
| <i>Hydnophytum tortuosum</i> Becc.                                                                                                                 | G. Chomicki<br>127 (M)      | Cultivated,<br>origin<br>Indonesian<br>Papua | KU963318 | KU963339 | KU963352 | KU963364 | KU963379 | KY002598 |
| <i>Hydnophytum archboldianum</i> Merr. & L.M.Perry                                                                                                 | G. Chomicki 95<br>(M)       | Cultivated,<br>origin<br>Indonesian<br>Papua | KX944396 | -        | KX944448 | KY002556 | KY002573 | KY002599 |
| <i>Hydnophytum</i> sp. ( <i>Hydnophytum minirubrum</i> n. nud. in M.H.P. Jebb and C.R. Huxley's ongoing revision)                                  | M.H.P. Jebb<br>288 (FHO)    | Papua New<br>Guinea                          | KX944397 | KX944428 | -        | -        | -        | KY002600 |
| <i>Hydnophytum</i> sp. ( <i>Hydnophytum magnirubrum</i> n. nud. in M.H.P. Jebb and C.R. Huxley's ongoing revision)                                 | M.H.P. Jebb<br>262 (FHO)    | Papua New<br>Guinea                          | KX944398 | KX944429 | -        | -        | -        | KY002601 |
| <i>Hydnophytum</i> sp. ( <i>Hydnophytum multituberosum</i> n. nud. in M.H.P. Jebb and C.R. Huxley's ongoing revision)                              | M.H.P. Jebb<br>998 (BO)     | Waigeo<br>Island,<br>Indonesia               | -        | -        | -        | -        | -        | KY002602 |
| <i>Hydnophytum tetrapterum</i> Becc.                                                                                                               | L.E. Cheesman<br>32 (BM)    | Papua New<br>Guinea                          | KU963319 | KU963340 | -        | -        | -        | KY002603 |
| <i>Hydnophytum ramispinum</i> Merr. & L.M.Perry                                                                                                    | Recende 13<br>(BM)          | Papua New<br>Guinea                          | KX944399 | KX944430 | -        | KY002557 | -        | -        |
| <i>Hydnophytum confertifolium</i> Merr. & L.M.Perry                                                                                                | G. Chomicki 85<br>(M)       | Cultivated,<br>origin West<br>Papua          | KX944400 | KX944431 | KX944449 | KY002558 | KY002574 | -        |
| <i>Hydnophytum contortum</i> Merr. & L.M. Perry                                                                                                    | M.P.H. Jebb 310<br>(FHO)    | Papua New<br>Guinea                          | KU963321 | KU963342 | -        | KU963375 | -        | KY002604 |

|                                                                                                                        |                                          |                               |          |          |          |          |          |          |
|------------------------------------------------------------------------------------------------------------------------|------------------------------------------|-------------------------------|----------|----------|----------|----------|----------|----------|
| <i>Hydnophytum</i> sp.<br>( <i>Hydnophytum fusiforme</i> n. nud. in M.H.P. Jebb and C.R. Huxley's ongoing revision)    | L. Hamilton 3486 (FHO)                   | Papua New Guinea              | KX944401 | KX944432 | KX944450 | KY002559 | -        | KY002605 |
| <i>Hydnophytum</i> sp.<br>( <i>Hydnophytum magnirubrum</i> n. nud. in M.H.P. Jebb and C.R. Huxley's ongoing revision)  | J. I. Menzies 5937 (FHO)                 | Papua New Guinea              | KX944402 | KX944433 | KX944451 | KY002560 | -        | KY002606 |
| <i>Hydnophytum</i> sp.<br>( <i>Hydnophytum trichomanes</i> n. nud. in M.H.P. Jebb and C.R. Huxley's ongoing revision)  | R. Schlechter 18430 (BM)                 | Papua New Guinea              | -        | -        | -        | -        | -        | KY002607 |
| <i>Hydnophytum puffii</i> Low, Sugau & Wong                                                                            | G. Chomicki 93 (M)                       | Cultivated, origin Borneo     | KU963322 | KU963343 | KU963354 | KU963366 | KU963381 | KY002608 |
| <i>Hydnophytum</i> sp.<br>( <i>Hydnophytum acuminicalyx</i> n. nud. in M.H.P. Jebb and C.R. Huxley's ongoing revision) | M.H.P. Jebb 322 (L)                      | Papua New Guinea              | KX944403 | KX944434 | -        | -        | -        | KY002609 |
| <i>Hydnophytum caminiferum</i> Wistuba, U.Zimm., Gronem. & Marwinski                                                   | A. Wistuba 2014-001 (M)                  | West Papua                    | KX944404 | KX944435 | -        | -        | -        | -        |
| <i>Hydnophytum moseleyanum</i> Becc. 'agathifolium'                                                                    | C.R. Huxley 5902 (FHO)                   | Papua New Guinea              | KU963323 | KU963344 | KU963355 | KU963367 | -        | KY002610 |
| <i>Hydnophytum moseleyanum</i> Becc.                                                                                   | L. Barrabé & Rigault 1041 (NOU)          | Australia                     | KF675912 | KF675798 | KF676176 | KF676176 | KF676000 | KF676266 |
| <i>Hydnophytum moseleyanum</i> Becc.                                                                                   | G. Chomicki 92 (M)                       | Cultivated, origin Aru Island | KX944405 | KX944436 | KX944452 | KY002561 | -        | KY002611 |
| <i>Hydnophytum bracteatum</i> Valetton                                                                                 | H. Gay 467 (FHO)                         | Papua New Guinea              | KX944406 | KX944437 | -        | -        | -        | -        |
| <i>Hydnophytum</i> sp.<br>( <i>Hydnophytum hailans</i> n. nud. in M.H.P. Jebb and C.R. Huxley's ongoing revision)      | M.H.P. Jebb 571 (L)                      | Papua New Guinea              | KX944407 | -        | KX944453 | KY002562 | -        | KY002612 |
| <i>Hydnophytum microphyllum</i> Becc.                                                                                  | L0105910 (L)                             | Papua New Guinea              | KX944408 | -        | -        | -        | -        | -        |
| <i>Hydnophytum vacciniifolium</i> P.Royen                                                                              | G. Chomicki 98 (M)                       | Cultivated, origin Papua      | KU963324 | KU963345 | KU963356 | KU963368 | KU963382 | KY002613 |
| <i>Myrmecodia beccarii</i> Hook f.                                                                                     | G. Chomicki 99 (M)                       | Cultivated, origin Australia  | KU586347 | KU586366 | -        | -        | KU586398 | KY002614 |
| <i>Myrmecodia salomonensis</i> Becc.                                                                                   | C. R. Huxley and L. M. Turton 3442 (FHO) | Solomons                      | KU586351 | KU586370 | -        | -        | -        | KY002615 |
| <i>Myrmecodia dahlia</i> K.Schum.                                                                                      | J.I. Menzies 5947 (FHO)                  | Papua New Guinea              | KU586348 | KU586367 | KU963357 | KU963369 | KU586399 | KY002616 |



|                                                                                                            |                                             |                                                                  |          |          |          |          |          |          |
|------------------------------------------------------------------------------------------------------------|---------------------------------------------|------------------------------------------------------------------|----------|----------|----------|----------|----------|----------|
| <i>Myrmecodia rumphii</i><br>Becc.                                                                         | G. Chomicki<br>115 (M)                      | Cultivated                                                       | KX944409 | KX944438 | KX944454 | KY002563 | KY002575 | KY002617 |
| <i>Myrmecodia alata</i><br>Becc.                                                                           | J.I. Menzies s.n.<br>(L)                    | Papua                                                            | -        | -        | -        | -        | -        | KY002618 |
| <i>Myrmecodia jobiensis</i><br>Becc.                                                                       | G. Chomicki<br>101 (M)                      | Cultivated,<br>origin Papua                                      | KU963326 | KU963347 | KU963358 | KU963370 | KU963384 | KY002619 |
| <i>Myrmecodia albertisii</i><br>Becc. subsp. <i>valida</i><br>C.R.Huxley & Jebb                            | H.J. Gay 901<br>(FHO)                       | Papua New<br>Guinea                                              | -        | KU963327 | -        | -        | -        | KY002620 |
| <i>Myrmecodia schlechteri</i> subsp.<br><i>schlechteri</i> var.<br><i>schlechteri</i><br>C.R.Huxley & Jebb | H.J. Gay 488<br>(FHO)                       | Papua New<br>Guinea                                              | AF071988 | KX944439 | JN643394 | JN643394 | -        | KY002621 |
| <i>Myrmecodia pendens</i><br>Merr. & L.M.Perr.                                                             | C.R. Huxley<br>and J. Friday<br>5938 (FHO)  | Papua New<br>Guinea                                              | -        | KU963328 | -        | -        | -        | KY002622 |
| <i>Myrmecodia aureospina</i><br>C.R.Huxley & Jebb                                                          | M.P.H. Jebb<br>257 (FHO)                    | Papua New<br>Guinea                                              | -        | KU963335 | -        | -        | -        | -        |
| <i>Myrmecodia sterrophylla</i> Merr. &<br>L.M. Perry                                                       | M.P.H. Jebb<br>240 (L)                      | Papua New<br>Guinea                                              | KU963330 | -        | -        | -        | -        | KY002623 |
| <i>Myrmecodia lamii</i><br>Merr. & L.M.Perry                                                               | G. Chomicki<br>102 (M)                      | Cultivated,<br>origin<br>Indonesian<br>Papua,<br>Doorman'<br>top | KX944410 | KX944440 | KX944455 | KY002564 | KY002576 | -        |
| <i>Myrmecodia lamii</i><br>Merr. & L.M.Perry                                                               | G. Chomicki<br>103 (M)                      | Cultivated,<br>origin<br>Indonesian<br>Papua, Lake<br>Habbema    | KX944411 | KX944441 | KX944456 | -        | KY002577 | KY002624 |
| <i>Myrmecodia brassii</i><br>Merr. & L.M.Perry                                                             | G. Chomicki<br>125 (M)                      | Cultivated,<br>origin<br>Indonesian<br>Papua,<br>Doorman'        | KX944412 | -        | KX944457 | KY002565 | KY002578 | KY002625 |
| <i>Myrmecodia platytyrea</i> subsp.<br><i>platytyrea</i> (Becc.)<br>C.R.Huxley & Jebb                      | G. Chomicki<br>104 (M)                      | Cultivated,<br>origin Papua<br>New Guinea                        | KX944413 | KX944442 | KX944458 | KY002566 | KY002579 | KY002626 |
| <i>Myrmecodia platytyrea</i> subsp.<br><i>antoinii</i> (Becc.)<br>C.R.Huxley & Jebb                        | G. Chomicki<br>105 (M)                      | Cultivated,<br>origin<br>Australia                               | KX944414 | -        | KX944459 | KY002567 | KY002580 | KY002627 |
| <i>Myrmecodia ferox</i><br>C.R.Huxley & Jebb                                                               | C.R. Huxley &<br>Matiabe UPNG<br>5818 (FHO) | Papua New<br>Guinea                                              | -        | KU963334 | -        | -        | -        | KY002628 |
| <i>Myrmecodia longifolia</i> Valetton                                                                      | R.J. Johns 9760<br>(NSW)                    | Papua New<br>Guinea                                              | -        | KX944443 | -        | -        | -        | KY002629 |
| <i>Myrmecodia melanacantha</i><br>C.R.Huxley & Jebb                                                        | M.P.H. Jebb<br>248 (L)                      | Papua New<br>Guinea                                              | KU963331 | -        | -        | KY002568 | -        | KY002630 |
| <i>Myrmecodia horrida</i><br>C.R.Huxley & Jebb                                                             | G. Chomicki<br>100 (M)                      | Cultivated,<br>origin Papua<br>New Guinea                        | KU963329 | KU963338 | KU963359 | KU963371 | KU963385 | KY002631 |

|                                                                     |                                       |                                      |          |          |          |          |          |          |
|---------------------------------------------------------------------|---------------------------------------|--------------------------------------|----------|----------|----------|----------|----------|----------|
| <i>Myrmecodia gracilispina</i><br>C.R.Huxley & Jebb                 | M.P.H. Jebb 35<br>(FHO)               | Papua New<br>Guinea                  | -        | KU963333 | -        | -        | -        | KY002632 |
| <i>Myrmecodia pteroaspida</i><br>C.R.Huxley & Jebb                  | M.P.H. Jebb<br>804 (FHO)              | Papua New<br>Guinea                  | KU963325 | KU963346 | -        | -        | -        | -        |
| <i>Myrmephytum selebicum</i> (Becc.)<br>Becc.                       | G. Chomicki<br>120 (M)                | Cultivated,<br>origin Papua          | KU963320 | KU963341 | KU963360 | KU963372 | KU963386 | KY002633 |
| <i>Myrmephytum beccarii</i> Elmer                                   | G. Chomicki<br>118 (M)                | Cultivated,<br>origin<br>Philippines | KU586353 | KU586354 | KU963361 | KU963373 | KU586401 | -        |
| <i>Myrmephytum naumanii</i> (Warb.)<br>Huxley & Jebb                | G. Chomicki<br>119 (M)                | Cultivated,<br>origin West<br>Papua  | KX944415 | KX944444 | KX944460 | -        | KY002581 | KY002634 |
| <i>Myrmephytum arfakianum</i> (Becc.)<br>Huxley & Jebb              | M.H.P. Jebb<br>889 (FHO)              | West Papua,<br>Arfak<br>Mountains    | KX944416 | KX944445 | KX944461 | KY002569 | KY002582 | KY002635 |
| <i>Psychotria comptonii</i><br>S.Moore                              | L. Barrabé &<br>Rigault 1014<br>(NOU) | New<br>Caledonia                     | KF675927 | KF675823 | -        | -        | KF676015 | -        |
| <i>Psychotria dallachiana</i> Benth.                                | L. Barrabé &<br>Rigault 1048<br>(NOU) | Australia                            | KF675928 | KF675824 | -        | -        | KF676016 | -        |
| <i>Psychotria declieuxioides</i><br>S.Moore                         | L. Barrabé &<br>Nigote 937<br>(NOU)   | New<br>Caledonia                     | KF675932 | KF675828 | -        | -        | KF676020 | -        |
| <i>Psychotria faguettii</i><br>(Baill.) Schltr.                     | L. Barrabé et al.<br>820 (NOU)        | New<br>Caledonia                     | KF675934 | KF675831 | -        | -        | KF676023 | -        |
| <i>Psychotria fitzalanii</i><br>Benth.                              | L. Barrabé &<br>Rigault 1057<br>(NOU) | Australia                            | KF675935 | KF675832 | -        | -        | KF676024 | -        |
| <i>Psychotria goniocarpa</i><br>(Baill.) Guillaumin                 | L. Barrabé 586<br>(NOU)               | New<br>Caledonia                     | KF675940 | KF675838 | -        | -        | KF676029 | -        |
| <i>Psychotria hawaiiensis</i> (A.Gray)<br>Fosberg                   | Y. Pillon 1425<br>(NOU)               | Hawaii                               | KF675941 | KF675840 | -        | -        | KF676030 | -        |
| <i>Psychotria hivaoana</i><br>Fosberg                               | J-Y. Meyer<br>3071 (PAP)              | French<br>Polynesia                  | KF675942 | KF675841 | -        | -        | KF676031 | -        |
| <i>Psychotria insularum</i><br>A.Gray                               | Y. Pillon 909<br>(NOU)                | Wallis &<br>Futuna                   | KF675943 | KF675842 | -        | -        | KF676032 | -        |
| <i>Psychotria iteophylla</i><br>Stapf                               | B. Axelius 303<br>(S)                 | Borneo                               | -        | -        | -        | -        | -        | -        |
| <i>Psychotria loniceroides</i> Sieber ex<br>DC.                     | L. Barrabé &<br>Rigault 1042<br>(NOU) | Australia                            | KF675945 | KF675846 | -        | -        | KF676033 | -        |
| <i>Psychotria lorentzii</i><br>Valeton                              | A.<br>Puradyatmika<br>10460 (K)       | Papua New<br>Guinea                  | KF675946 | KF675847 | -        | -        | KF676034 | -        |
| <i>Psychotria micralabastra</i><br>(Lauterb. &<br>K.Schum.) Valeton | W. Takeuchi<br>16163 (K)              | Papua New<br>Guinea                  | KF675949 | KF675851 | -        | -        | KF676036 | -        |

|                                                             |                                                |                                            |          |          |          |          |          |   |
|-------------------------------------------------------------|------------------------------------------------|--------------------------------------------|----------|----------|----------|----------|----------|---|
| <i>Psychotria micrococca</i> (Lauterb. & K.Schum.) Valetton | P. Drozd & K. Molem s.n. (PSF)                 | Papua New Guinea                           | KF675951 | KF675853 | -        | -        | KF676038 | - |
| <i>Psychotria microglossa</i> (Baill.) Baill. ex Guillaumin | L. Barrabé 585 (NOU)                           | New Guinea                                 | KF675950 | KF675852 | -        | -        | KF676037 | - |
| <i>Psychotria monanthos</i> (Baill.) Schltr.                | Y. Pillon 1370 (NOU)                           | New Caledonia                              | KF675953 | KF675855 | -        | -        | KF676040 | - |
| <i>Psychotria poissoniana</i> (Baill.) Guillaumin           | J. Munzinger 5156 (NOU)                        | New Caledonia                              | KF675958 | KF675861 | -        | -        | KF676045 | - |
| <i>Psychotria pritchardii</i> Seem.                         | L. Barrabé et al 1124 (NOU)                    | Fiji                                       | KF675992 | KF675903 | -        | -        | KF676078 | - |
| <i>Psychotria raivavaensis</i> Fosberg                      | J-Y. Meyer 3088 (PAP)                          | French Polynesia                           | KF675960 | -        | -        | -        | KF676047 | - |
| <i>Psychotria submontana</i> Domin                          | L. Barrabé et al. 1044 (NOU)                   | Australia                                  | KF675988 | KF675899 | -        | -        | -        | - |
| <i>Psychotria temehaniensis</i> J.W.Moore                   | A. Mouly 403 (P)                               | French Polynesia                           | KF675989 | KF675900 | -        | -        | KF676075 | - |
| <i>Psychotria trisulcata</i> (Baill.) Guillaumin            | L. Barrabé et al. 902 (NOU)                    | New Caledonia                              | KF675990 | KF675901 | -        | -        | KF676076 | - |
| <i>Squamellaria grandiflora</i> (Becc.) Chomicki            | S. Vodonaivolou DA2128 (SUVA)                  | Fiji, Kadavu Island                        | -        | KU963388 | -        | -        | -        | - |
| <i>Squamellaria grayi</i> Chomicki & Wistuba                | G. Chomicki, J. Aroles, A. Naikatini 53 (SUVA) | Taveuni, Bouma falls, Lavena               | KU586339 | KU586358 | KU586376 | KU586376 | KU586388 | - |
| <i>Squamellaria grayi</i> Chomicki & Wistuba                | G. Chomicki, J. Aroles, A. Naikatini 47 (M)    | Vanua Levu, Waisali forest park            | -        | -        | KU586372 | KU586372 | -        | - |
| <i>Squamellaria guppyana</i> (Becc.) Chomicki               | G. Chomicki 123 (M)                            | Cultivated, origin Solomons                | KU586345 | -        | -        | -        | KU586396 | - |
| <i>Squamellaria huxleyana</i> Chomicki                      | G. Chomicki, J. Aroles, A. Naikatini 48 (SUVA) | Fiji, Vanua Levu, road between Savanua to  | KU586336 | KU586355 | KU586373 | KU586373 | KU586385 | - |
| <i>Squamellaria imberbis</i> (A. Gray) Becc.                | G. Chomicki, J. Aroles, A. Naikatini 50 (M)    | Fiji, Vanua Levu, track to vodophone tower | KU586337 | KU586356 | KU586374 | KU586374 | KU586386 | - |
| <i>Squamellaria jebbiana</i> Chomicki,                      | G. Chomicki, J. Aroles, A. Naikatini 74 (M)    | Fiji, Taveuni, Mt Manuca area.             | KU586342 | KU586361 | KU586379 | KU586379 | KU586391 | - |
| <i>Squamellaria kajewskii</i> (Merr. & L.M.Perry) Chomicki  | G. Chomicki 122 (M)                            | Cultivated, origin Solomons                | KU586335 | -        | -        | -        | KU586384 | - |
| <i>Squamellaria major</i> A.C. Sm.                          | G. Chomicki, J. Aroles, A. Naikatini 61 (M)    | Fiji, Taveuni, road to DesVoeux peak.      | KU586338 | KU586357 | KU586375 | KU586375 | KU586387 | - |
| <i>Squamellaria tenuiflora</i> (Becc.) Chomicki             | G. Chomicki, J. Aroles, A. Naikatini 75 (M)    | Fiji, Viti Levu, Colo-i-Suva forest park.  | -        | -        | KU586381 | KU586381 | KU586393 | - |
| <i>Squamellaria tenuiflora</i> (Becc.) Chomicki             | G. Chomicki, J. Aroles, A. Naikatini 78 (M)    | Fiji, Viti Levu, Colo-i-Suva forest park.  | KU586343 | KU586362 | KU586382 | KU586382 | KU586394 | - |

|                                                                      |                                             |                                        |          |          |          |          |          |   |
|----------------------------------------------------------------------|---------------------------------------------|----------------------------------------|----------|----------|----------|----------|----------|---|
| <b><i>Squamellaria thekii</i><br/>Jebb</b>                           | G. Chomicki, J. Aroles, A. Naikatini 57 (M) | Fiji, Taveuni, road to DesVoeux peak.  | KU586340 | KU586359 | KU586377 | KU586377 | KU586389 | - |
| <b><i>Squamellaria vanuatuensis</i> (Jebb &amp; Huxley) Chomicki</b> | G. McPherson 19437 (P)                      | Vanuatu                                | JX155078 | -        | -        | -        | -        | - |
| <b><i>Squamellaria wilkinsonii</i> (Horne ex Baker) Chomicki</b>     | G. Chomicki, J. Aroles, A. Naikatini 43 (M) | Fiji, Vanua Levu, Waisali forest park. | -        | -        | KU586380 | KU586380 | KU586392 | - |
| <b><i>Squamellaria wilkinsonii</i> (Horne ex Baker) Chomicki</b>     | G. Chomicki, J. Aroles, A. Naikatini 49 (M) | Fiji, Vanua Levu, Waisali forest park. | -        | KU586364 | -        | -        | -        | - |
| <b><i>Squamellaria wilkinsonii</i> (Horne ex Baker) Chomicki</b>     | G. Chomicki, J. Aroles, A. Naikatini 45 (M) | Fiji, Vanua Levu, Waisali forest park. | KU586344 | KU586363 | KU586383 | -        | KU586395 | - |
| <b><i>Squamellaria wilsonii</i> (Horne ex Baker) Becc.</b>           | G. Chomicki, J. Aroles, A. Naikatini 67 (M) | Fiji, Taveuni, road to DesVoeux peak.  | KU586341 | KU586360 | KU586378 | -        | KU586390 | - |
